# Supplementary material for: Excess mortality in adults with documented diabetes in Germany: routine data analysis of all insurance claims in Germany 2013–2014
Source: PubMed Central journal article supplement — BMJ Open. 2021 Jan 6;11(1):e041508. doi: 10.1136/bmjopen-2020-041508 (PMC7789443; doi:10.1136/bmjopen-2020-041508), 2021-01-06
Supplement: bmjopen-2020-041508.draft_revisions.pdf [file bmjopen-2020-041508.draft_revisions.pdf]

# BMJ Open

BMJ Open is committed to open peer review. As part of this commitment we make the peer review history of every article we publish publicly available.

When an article is published we post the peer reviewers' comments and the authors' responses online. We also post the versions of the paper that were used during peer review. These are the versions that the peer review comments apply to.

The versions of the paper that follow are the versions that were submitted during the peer review process. They are not the versions of record or the final published versions. They should not be cited or distributed as the published version of this manuscript.

BMJ Open is an open access journal and the full, final, typeset and author-corrected version of record of the manuscript is available on our site with no access controls, subscription charges or pay-per-view fees (<http://bmjopen.bmj.com>).

If you have any questions on BMJ Open's open peer review process please email [info.bmjopen@bmj.com](mailto:info.bmjopen@bmj.com)

# BMJ Open

## All-cause mortality in adults with and without diabetes – Analysis of statutory health insurance claims data in Germany 2013-2014

|                               |                                                                                                                                                                                                                                                                                                                                                                                                                                                                                                                                                                                                                                                                     |
|-------------------------------|---------------------------------------------------------------------------------------------------------------------------------------------------------------------------------------------------------------------------------------------------------------------------------------------------------------------------------------------------------------------------------------------------------------------------------------------------------------------------------------------------------------------------------------------------------------------------------------------------------------------------------------------------------------------|
| Journal:                      | <i>BMJ Open</i>                                                                                                                                                                                                                                                                                                                                                                                                                                                                                                                                                                                                                                                     |
| Manuscript ID                 | bmjopen-2020-041508                                                                                                                                                                                                                                                                                                                                                                                                                                                                                                                                                                                                                                                 |
| Article Type:                 | Original research                                                                                                                                                                                                                                                                                                                                                                                                                                                                                                                                                                                                                                                   |
| Date Submitted by the Author: | 10-Jun-2020                                                                                                                                                                                                                                                                                                                                                                                                                                                                                                                                                                                                                                                         |
| Complete List of Authors:     | Schmidt, Christian; Robert Koch Institute, Department of Epidemiology and Health Monitoring<br>Reitzle, Lukas; Robert Koch Institute, Department of Epidemiology and Health Monitoring<br>Heidemann, Christin; Robert Koch Institute, Department of Epidemiology and Health Monitoring<br>Paprott, Rebecca; Robert Koch Institute, Department of Epidemiology and Health Monitoring<br>Ziese, Thomas; Robert Koch Institute, Department of Epidemiology and Health Monitoring<br>Scheidt-Nave, Christa; Robert Koch-Institut, Dept. of Epidemiology and Health Monitoring<br>Baumert, Jens; Robert Koch Institute, Department of Epidemiology and Health Monitoring |
| Keywords:                     | General diabetes < DIABETES & ENDOCRINOLOGY, EPIDEMIOLOGY, PUBLIC HEALTH                                                                                                                                                                                                                                                                                                                                                                                                                                                                                                                                                                                            |
|                               |                                                                                                                                                                                                                                                                                                                                                                                                                                                                                                                                                                                                                                                                     |

SCHOLARONE™  
Manuscripts

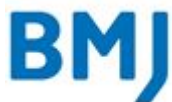

I, the Submitting Author has the right to grant and does grant on behalf of all authors of the Work (as defined in the below author licence), an exclusive licence and/or a non-exclusive licence for contributions from authors who are: i) UK Crown employees; ii) where BMJ has agreed a CC-BY licence shall apply, and/or iii) in accordance with the terms applicable for US Federal Government officers or employees acting as part of their official duties; on a worldwide, perpetual, irrevocable, royalty-free basis to BMJ Publishing Group Ltd ("BMJ") its licensees and where the relevant Journal is co-owned by BMJ to the co-owners of the Journal, to publish the Work in this journal and any other BMJ products and to exploit all rights, as set out in our [licence](#).

The Submitting Author accepts and understands that any supply made under these terms is made by BMJ to the Submitting Author unless you are acting as an employee on behalf of your employer or a postgraduate student of an affiliated institution which is paying any applicable article publishing charge ("APC") for Open Access articles. Where the Submitting Author wishes to make the Work available on an Open Access basis (and intends to pay the relevant APC), the terms of reuse of such Open Access shall be governed by a Creative Commons licence – details of these licences and which [Creative Commons](#) licence will apply to this Work are set out in our licence referred to above.

Other than as permitted in any relevant BMJ Author's Self Archiving Policies, I confirm this Work has not been accepted for publication elsewhere, is not being considered for publication elsewhere and does not duplicate material already published. I confirm all authors consent to publication of this Work and authorise the granting of this licence.

1  
2  
3  
4 1 All-cause mortality in adults with and without diabetes – Analysis of statutory  
5 2 health insurance claims data in Germany 2013-2014

6  
7 3 Christian Schmidt, research associate, Lukas Reitzle, research associate, Christin Heidemann  
8 4 senior research associate, Rebecca Paprott, research associate, Thomas Ziese, head of unit  
9 5 health reporting, Christa Scheidt-Nave, head of unit physical health, Jens Baumert, senior  
10 6 research associate

11  
12 7 All authors: Department of Epidemiology and Health Monitoring, Robert Koch Institute, Berlin,  
13 8 Germany, General-Pape-Str. 62-66, 12101 Berlin

14  
15 9 **Corresponding author:**

16  
17 10 Christian Schmidt  
18 11 Tel. +4930187543269; E-Mail: [schmidtchri@rki.de](mailto:schmidtchri@rki.de)  
19 12 Department of Epidemiology and Health Monitoring  
20 13 Robert Koch Institute, Berlin, Germany  
21 14

22  
23 15 **Email-Addresses of Authors:**

24 16 Lukas Reitzle: [reitzlel@rki.de](mailto:reitzlel@rki.de)  
25 17 Christin Heidemann: [heidemannc@rki.de](mailto:heidemannc@rki.de)  
26 18 Rebecca Paprott: [paprottr@rki.de](mailto:paprottr@rki.de)  
27 19 Thomas Ziese: [zieset@rki.de](mailto:zieset@rki.de)  
28 20 Christa Scheidt-Nave: [scheidt-navec@rki.de](mailto:scheidt-navec@rki.de)  
29 21 Jens Baumert: [baumertj@rki.de](mailto:baumertj@rki.de)  
30 22

31  
32 23 **Keywords:** Diabetes mellitus, Mortality, Epidemiology, Surveillance, Claims data  
33  
34  
35  
36  
37  
38  
39  
40  
41  
42  
43  
44  
45  
46  
47  
48  
49  
50  
51  
52  
53  
54  
55  
56  
57  
58  
59  
60

1  
2  
3 25 **Abstract**

4  
5 26 Objectives

6  
7 27 Little is known about the age-specific excess mortality pattern of people with diagnosed  
8 28 diabetes in Germany. Thus, our goal was to determine the excess mortality in diagnosed  
9 29 diabetes overall and stratified by age and sex based on claims data.

10  
11 30 Design

12  
13 31 Routine data analysis using a claims dataset from all statutory health insured persons in  
14 32 Germany in 2013, which accounts for about 90% of the population.

15  
16 33 Participants

17  
18 34 We included persons who lived in Germany, were insured at least 360 days, were not self-  
19 35 paying any health services and were aged 30 years or older leading to a total number of 47.3  
20 36 million insured persons for analyses.

21  
22 37 Exposure

23  
24 38 Diabetes was determined by ICD-10 codes E10 to E14, which were documented in 2013 in at  
25 39 least two quarters on an outpatient setting or at least once on an inpatient setting.

26  
27 40 Outcome measures

28  
29 41 The vital status in the study population was drawn from the claims dataset for the year 2014.  
30 42 We derived the excess mortality estimated as an age-adjusted mortality rate ratio (MRR) by  
31 43 sex and for age groups using a Poisson model.

32  
33 44 Main Results

34  
35 45 We found age-adjusted MRRs (95% CI) for diabetes of 1.52 (1.51 to 1.52) for women and 1.56  
36 46 (1.56 to 1.56) for men. These figures declined with increasing age and were highest for age 30  
37 47 to 34 years with 6.76 (4.99 to 9.15) for women and 6.87 (5.46 to 8.64) for men and lowest for  
38 48 age 95 years and older with 1.13 (1.10 to 1.15) for women and 1.11 (1.05 to 1.17) for men.

39  
40 49 Conclusions

41  
42 50 For the first time, we derived deeply age-stratified figures on excess mortality in diabetes for  
43 51 Germany. Establishing a sustainable analysis of excess mortality is aimed at within the  
44 52 framework of diabetes surveillance.

45  
46  
47  
48  
49  
50  
51  
52  
53  
54  
55  
56  
57  
58  
59  
60

1  
2  
3 54 **Strengths and limitations of this study**  
4

- 5 55 • The study is based on documented data of all statutorily insured patients  
6 accounting for about 90% of the German population.  
7 56  
8  
9 57 • Mortality rates derived from the study data showed very good agreement with  
10 data from official death statistics covering the entire German population.  
11 58  
12  
13 59 • For the first time, this analysis allowed to assess detailed age-related patterns  
14 in women and men in the German population.  
15 60  
16  
17 61 • Our results are robust with respect to variation of the case definition of  
18 diabetes.  
19 62  
20  
21 63 • The study data are limited to documented diagnoses, i.e. no information about  
22 undiagnosed morbidity is available.  
23 64  
24  
25  
26  
27  
28  
29  
30  
31  
32  
33  
34  
35  
36  
37  
38  
39  
40  
41  
42  
43  
44  
45  
46  
47  
48  
49  
50  
51  
52  
53  
54  
55  
56  
57  
58  
59  
60

## 66 **Introduction**

67 Diabetes mellitus is a chronic metabolic disease of high public health impact in  
68 Germany and worldwide.<sup>1</sup> According to the Global Burden of Disease Study 2017  
69 diabetes ranks among the top 10 leading causes of death globally.<sup>2</sup> Available treatment  
70 with insulin and glucose lowering drugs has greatly reduced the risk of acute  
71 complications and premature mortality. Nevertheless, persons with diabetes still have  
72 a higher age-adjusted risk of death compared to persons without diabetes mainly  
73 because of an increased risk of micro- and macrovascular complications.<sup>3</sup>

74 Monitoring diabetes-associated mortality over time is an important part of national  
75 diabetes surveillance activities, as the age-specific excess risk of death among persons  
76 with diabetes compared to those without diabetes serves as an indicator of quality of  
77 diabetes care. Some countries, such as Sweden, Denmark and Scotland have  
78 established national diabetes registers, and along with a legal basis for individual  
79 health data linkage, these data allow a reliable assessment of diabetes-associated  
80 mortality in comparison to the general population<sup>4 5</sup> or population-based controls.<sup>6</sup>  
81 Results from these countries consistently demonstrate a significantly higher risk of  
82 death in association with diabetes, but greatly vary with regard to the overall  
83 magnitude of excess risk as well as sex differences. A recent meta-analysis of diabetes-  
84 associated all-cause-mortality based on 86 prospective cohorts showed a higher  
85 pooled adjusted relative risk of death among women than men (1.93 vs. 1.74 ).<sup>7</sup> The  
86 studies from Sweden as well as a further study from Australia have been age  
87 disaggregated, indicating that excess mortality among persons with type 2 diabetes  
88 significantly decreases with increasing chronological age.<sup>6 8</sup>

89 In Germany, a national diabetes surveillance system is currently being established at  
90 the Robert Koch Institute as the national public health institute. One of the main goals  
91 is to cover the diabetes-associated mortality continuously ([www.diabsurv.rki.de](http://www.diabsurv.rki.de)). Over  
92 the past 20-years a number of epidemiological studies in Germany have provided  
93 estimates of mortality rate ratios (MRRs) comparing mortality rates among persons  
94 with and without diabetes. The results from these studies vary due to differences in  
95 study design and study populations, methodological issues, regional vs. national data,  
96 follow-up time, and insight from age- and sex-stratified analyses is limited due to the

1  
2  
3 97 small number of observations.<sup>9</sup> In addition to these population-based estimates, a  
4  
5 98 recent study estimated diabetes-associated MRRs for the population 65-90 years of  
6  
7 99 age in Germany based on mathematical modeling using official death statistics, and  
8  
9 100 prevalence and incidence estimates derived from statutory health insurance (SHI)  
10  
11 101 claims data.<sup>10</sup>

12  
13 102 Information on mortality has recently been added to a SHI claims dataset with  
14  
15 103 complete records of all insured persons, which is accessible to health researchers in  
16  
17 104 Germany. The present study for the first time used outpatient and inpatient SHI claims  
18  
19 105 data drawn from this dataset to analyse observed mortality rates for adults in  
20  
21 106 Germany with and without diagnosed diabetes. Our main aim was to provide  
22  
23 107 estimates of MRRs associated with diabetes within strata of narrow age bands and sex.

## 24 108 **Methods**

### 25 109 **Source of data**

26  
27  
28 110 We used the SHI claims research dataset hosted by the German Institute for Medical  
29  
30 111 Documentation and Information (DIMDI).<sup>11</sup> According to the Data Transparency  
31  
32 112 Regulation Act (DaTraV) 2012 this dataset has been made accessible to authorized  
33  
34 113 health researchers. Originally, these data were collected within the scope of the  
35  
36 114 German morbidity-based risk-adjustment scheme.<sup>12</sup> The dataset includes medical data  
37  
38 115 from approximately 70 million people covered by SHI, which are about 90% of the  
39  
40 116 German population. The DaTraV data contain complete data on outpatient and  
41  
42 117 inpatient diagnoses as well as prescribed drugs and the vital status.<sup>11</sup> Therefore, the  
43  
44 118 data can be analyzed across all sectors of care and providers within the SHI system. For  
45  
46 119 reasons of data protection, there is no direct access to these stored individual data.  
47  
48 120 Analyses are limited to aggregate data, which can be requested from the DIMDI data  
49  
50 121 processing centre. A research question needs to be submitted together with an  
51  
52 122 analytical scheme or a syntax query for data analysis. The request has to be approved  
53  
54 123 by the data processing centre and the aggregated results are checked and transmitted  
55  
56 124 to the applicant.

57  
58 125 We developed an SQL script for the analysis of mortality rates among persons with and  
59  
60 126 without diabetes based on DaTraV datasets 2013 and 2014. As described in detail



1  
2  
3 127 below, the SQL script had to take into account several specifics of the data, including  
4  
5 128 assessment of vital status and the case definition for diabetes.<sup>13</sup>  
6

### 7 129 **Study population**

8  
9 130 Information from more than 70 million SHI persons was available for the year 2013  
10  
11 131 (Figure 1). In addition to the individual SHI identification number, the year of birth and  
12  
13 132 sex were checked for unique assignment to the insured person. Persons with an  
14  
15 133 insured period of less than 360 days, persons who cover at least partly their own  
16  
17 134 health expenditure and persons with main residence abroad were excluded from the  
18  
19 135 analysis, because this may have precluded documentation of diabetes within the year  
20  
21 136 2013.

22 137 After these exclusions but mainly due to an insurance period of less than 360 days,  
23  
24 138 about 65.8 million persons were considered eligible for analysis. In addition, persons  
25  
26 139 aged younger than 30 years were excluded for data protection reasons due to the  
27  
28 140 small number of deaths among persons with diabetes in these age groups. The final  
29  
30 141 study population hence comprised a total of 47.3 million persons (Figure 1). Of these,  
31  
32 142 6.5 million persons with diabetes fulfilled the case definition for diabetes and 40.8  
33  
34 143 million persons were defined as having no diabetes. As the flow chart reveals, 0.29  
35  
36 144 million persons in the population with diabetes and 0.48 million persons in the  
37  
38 145 population without diabetes died in 2014 (Figure 1).  
39

40 146

### 41 147 **Patient and public involvement**

42 148 No patient involved.  
43  
44 149

45  
46 150 **Figure 1** Flow chart of selection of study population with excluding criteria and sample  
47  
48 151 sizes

### 49 50 51 152 **Definition of diabetes**

52  
53 153 We used the International Classification of Diseases (ICD-10) codes E10.- to E14.- to  
54  
55 154 define diabetes:

- 56  
57  
58 155 • E10.- Type 1 diabetes mellitus  
59  
60

- 156 • E11.- Type 2 diabetes mellitus
- 157 • E12.- Malnutrition related diabetes mellitus
- 158 • E13.- Other specified diabetes mellitus, for example diabetes related to
- 159 pancreatic insufficiency
- 160 • E14.- Unspecified diabetes mellitus.

161 In the outpatient setting, documentation of an additional ICD-tag “G” is required to  
162 indicate a confirmed diagnosis of diabetes. In the present analysis, this additional  
163 requirement was applied to all data originating in the outpatient setting, in order to  
164 increase the validity of the case definition for diabetes. Furthermore, an outpatient  
165 diagnosis of diabetes had to be documented in at least two quarters of the year for  
166 validation reasons. This definition is related to the m2Q criterion, which was originally  
167 used for reimbursement and is also recommended for epidemiological studies<sup>14</sup>. In  
168 the case of inpatient-documented diagnosis, one primary or secondary diagnosis of  
169 diabetes in the year 2013 was sufficient to identify a diabetes case.

170 In order to examine the impact of potential misclassification on the results, we  
171 conducted sensitivity analyses applying modified case definitions for diagnosed  
172 diabetes based on less stringent criteria: first, documentation of at least one confirmed  
173 outpatient diagnosis or one inpatient diagnosis in 2013 (“m1Q criterion”), and  
174 secondly, documentation of only one confirmed outpatient diagnosis in 2013 without  
175 any documented inpatient diagnosis.

### 177 **Assessment of mortality**

178 We calculated the mortality rates based on the vital status in 2014, since in the event  
179 of death no diagnoses for the year of death are available in the dataset.<sup>11</sup> The reason  
180 for this approach is that the SHI claims dataset was originally created only for  
181 morbidity-adjusted reimbursement of SHI companies and diagnoses in the year of  
182 death were not transmitted. Therefore, we used the difference of the year 2014 and  
183 the year of birth to calculate the age groups.

184 In order to examine whether assessment of vital status in the SHI claims dataset  
185 produced plausible results, we compared the observed overall mortality rates as total  
186 counts per 100,000 persons across age groups and stratified by sex with the  
187 corresponding mortality rates from the official cause of death statistics in Germany for

1  
2  
3 188 the year 2014.<sup>15</sup> As illustrated in Figure 2 mortality rates per 100,000 persons based on  
4  
5 189 data from both sources showed high consistency in both sexes and in nearly all age  
6  
7 190 groups, with only minor deviations among middle-aged men and women 85 years of  
8  
9 191 age and older.

10  
11 192 **Figure 2** Age-specific mortality rates per 100,000 persons stratified by sex for the year  
12  
13 193 2014 as obtained from official cause of death statistics (Destatis) and claims data  
14  
15 194 (Datrav). The blue line indicates results from official statistics; the green line indicates  
16  
17 195 results from the DaTraV dataset.

### 18 196 **Statistical analysis**

19  
20 197 We estimated age- and sex-specific MRRs and 95% confidence intervals using Poisson  
21  
22 198 regression. We applied the GENMOD procedure implemented in the statistical  
23  
24 199 software SAS (Version 9.4 for Windows)<sup>16</sup>. Due to the aggregated count data of our  
25  
26 200 study population, we applied a count model for MRR estimations. We preferred a  
27  
28 201 Poisson model to a log-binomial model or negative binomial model, as the Poisson  
29  
30 202 distribution provides a good approximation to the underlying binomial distribution due  
31  
32 203 to increasing sample size and better convergence properties<sup>16</sup>. One central  
33  
34 204 assumption of the model is equality of mean and variance, which is often not fulfilled  
35  
36 205 for count data. In our analyses, we had to handle a large sample size, which tends to  
37  
38 206 result in a lower variance with respect to the mean value, what is called  
39  
40 207 underdispersion and could lead to biased, smaller standard errors. Therefore, we used  
41  
42 208 the residual deviance as scale parameter.

43  
44 209 We estimated MRRs separately for both sexes and over 5-year age groups for adults in  
45  
46 210 the age range 30 to 95 years and older. We also calculated age-adjusted MRRs  
47  
48 211 stratified by sex based on the 5-year age groups.

49  
50 212 In order to assess the impact of modified case definitions on the study results, we  
51  
52 213 conducted two sensitivity analyses calculating the age-adjusted MRRs for men and  
53  
54 214 women as described above.

1  
2  
3 215 **Results**

4  
5 216 **Description of the study population**

6  
7 217 Compared to men, women were overrepresented in the population without diabetes,  
8  
9 218 whereas proportions of men and women were similar in the population with diabetes  
10  
11 219 (Table 1). Accordingly, the diabetes prevalence among women (12.8%) was lower than  
12  
13 220 in men (14.9%). As expected, the population with diabetes had a higher mean age  
14  
15 221 compared to the population without diabetes. On average, women were older than  
16  
17 222 men among persons with and without diabetes. In terms of absolute numbers, more  
18  
19 223 women than men died in 2014 in the population with and without diabetes. However,  
20  
21 224 age-specific and age-standardized mortality rates per 1,000 persons were consistently  
22  
23 225 higher among men than women in both populations. In both sexes, mortality rates per  
24  
25 226 1,000 persons were markedly higher among individuals with than without diabetes  
26  
27 227 (Table 1).  
28  
29  
30  
31  
32  
33  
34  
35  
36  
37  
38  
39  
40  
41  
42  
43  
44  
45  
46  
47  
48  
49  
50  
51  
52  
53  
54  
55  
56  
57  
58  
59  
60

229 **Table 1** Descriptive characteristics of the study population by diabetes status and sex  
 230 (DaTraV, age  $\geq$  30 years)

|                                                        | No diabetes |         | Diabetes |         |
|--------------------------------------------------------|-------------|---------|----------|---------|
|                                                        | Women       | Men     | Women    | Men     |
| Population size<br>in M. (2013)                        | 22,5        | 18,3    | 3,3      | 3,2     |
| Proportion (%)<br>2013                                 | 55.1        | 44.9    | 50.8     | 49.2    |
| Mean age in years 2013                                 | 55.9        | 53.6    | 71.5     | 67.9    |
| Number of deaths 2014                                  | 254,408     | 220,305 | 148,491  | 140,024 |
| Mortality rate per 1,000 persons*                      | 12.00       | 12.74   | 19.96    | 21.91   |
| Mortality rate per 1,000 persons across<br>age groups* |             |         |          |         |
| 30 to 34 years                                         | 0.30        | 0.62    | 2.03     | 4.26    |
| 35 to 39 years                                         | 0.45        | 0.87    | 1.86     | 4.38    |
| 40 to 44 years                                         | 0.77        | 1.40    | 3.75     | 5.31    |
| 45 to 49 years                                         | 1.29        | 2.34    | 4.62     | 7.64    |
| 50 to 54 years                                         | 2.23        | 4.13    | 6.95     | 10.18   |
| 55 to 59 years                                         | 3.41        | 6.73    | 9.19     | 14.55   |
| 60 to 64 years                                         | 5.21        | 10.71   | 11.18    | 19.84   |
| 65 to 69 years                                         | 7.80        | 15.44   | 15.42    | 25.84   |
| 70 to 74 years                                         | 11.63       | 22.35   | 22.56    | 38.24   |
| 75 to 79 years                                         | 19.15       | 33.64   | 35.17    | 55.34   |
| 80 to 84 years                                         | 40.02       | 62.14   | 62.97    | 89.99   |
| 85 to 89 years                                         | 83.06       | 111.42  | 113.91   | 144.18  |
| 90 to 94 years                                         | 157.24      | 191.04  | 194.06   | 229.21  |
| 95 years and older                                     | 270.33      | 303.74  | 304.13   | 336.90  |

231 \*age-standardized to the German population 2013 using all displayed age groups

232

## 233 **Main Analysis**

234 **Figure 3** MRRs for persons with diabetes compared to persons without diabetes by sex  
235 and age groups. Overall estimates are adjusted using all displayed age groups.

236 MRR estimates in association with diagnosed diabetes as obtained from Poisson  
237 regression are depicted in Figure 3. For both sexes, the age-specific MRR estimates  
238 decreased with increasing chronological age from 6.76 among women and 6.87 among  
239 men in the youngest age group to 3.12 among women and 2.46 among men aged 50-  
240 54 years to 1.13 among women and 1.11 among men aged 95 years and older. Except  
241 for persons younger than 40 years of age, MRR estimates in association with diabetes  
242 were higher among women than men. In particular, among persons 50-79 years, the  
243 MRR was between 1.26 and 1.12 significantly times higher among women than men.

244 Overall adjusted MRR estimates were comparable for women and men (1.52 vs. 1.56).  
245 Constraining our analysis to persons below 90 years of age reversed the overall age-  
246 adjusted MRRs regarding sex with still comparable estimates of 1.66 for women and  
247 1.61 for men.

## 248 **Sensitivity analyses**

249 An excess risk of death in association with diabetes among men and women was  
250 confirmed in two sensitivity analyses applying less stringent case definitions for  
251 diabetes (Table 2).

252 Compared to the main analysis, where the case definition for diabetes required  
253 documentation of a confirmed diabetes diagnosis in at least two quarters of the year  
254 2013 for outpatient data or one inpatient diagnosis of diabetes in 2013, the first case  
255 definition in Table 2 additionally includes persons with only one confirmed outpatient  
256 diagnosis of diabetes in 2013. This means that about 0.5 million persons were added to  
257 the population with diabetes and at the same time removed from the population  
258 without diabetes compared to the numbers used for the main analysis as shown in  
259 Figure 1. Results of this sensitivity analysis were similar to those of the main analysis,  
260 with only slightly lower overall MRR estimates of 1.51 among women and 1.55 among  
261 men. In contrast, markedly attenuated overall MRR estimates were obtained in the  
262 second sensitivity analysis, where the case definition for diabetes was based on the

documentation of only one confirmed outpatient diagnosis. Still, the age-adjusted MRRs resulting from this case definition showed a significantly nearly 20% higher risk of death in men and women with diagnosed diabetes compared to those without diagnosed diabetes (Table 2).

**Table 2** Sensitivity analyses applying modified diabetes case definitions: number of persons by diabetes status and age-adjusted MRRs stratified by sex (DaTraV, age  $\geq$  30 years).

|                         | Women                            |                        | Men                              |                        |
|-------------------------|----------------------------------|------------------------|----------------------------------|------------------------|
|                         | N<br>(no diabetes /<br>diabetes) | MRRs<br>(95% CI)       | N<br>(no diabetes /<br>diabetes) | MRRs<br>(95% CI)       |
| Sensitivity analysis 1* | 22.3 M/<br>3.6 M                 | 1.51<br>(1.51 to 1.51) | 18.1 M/<br>3.4 M                 | 1.55<br>(1.55 to 1.55) |
| Sensitivity analysis 2# | 22.3 M/<br>0.25 M                | 1.19<br>(1.18 to 1.20) | 18.1 M/<br>0.21 M                | 1.20<br>(1.19 to 1.21) |

\* Documentation of at least one outpatient (confirmed) or inpatient diagnosis of diabetes in 2013

# Documentation of only one outpatient (confirmed) diagnosis of diabetes in 2013. Deviations from figures in figure 1 are due to rounding.

## Discussion

### Main findings

To the best of our knowledge, we present for the first time deeply age-stratified MRR estimates in association with diagnosed diabetes among men and women 30 years of age and older in Germany based on SHI claims data covering about 90% of the population. Overall, men and women with diabetes had an about 50% higher age-adjusted risk of death compared to adults without diabetes. Across strata of increasing age, the diabetes-associated MRRs considerably decreased with slightly higher estimates among women than men in the population aged 40-80 years. Results persisted in sensitivity analyses applying modified case definitions for diabetes, with the exception of markedly reduced albeit still significantly higher diabetes-associated risk of death based on the least stringent case definition for diabetes requiring only one outpatient diagnosis for diabetes throughout the year 2013.

1  
2  
3 286 Our findings regarding age-related decreases in diabetes-associated MRRs partly agree  
4  
5 287 with results from two previous nationwide studies in Germany.<sup>10 17</sup> A population-based  
6  
7 288 cohort study based on 12-year-mortality follow-up of adults participating in the  
8  
9 289 German National Health Interview and Examination Survey 1998 (GNHIES98) reported  
10  
11 290 decreasing age-specific diabetes-associated MRRs in both sexes as well as overall age-  
12  
13 291 adjusted MRR estimates of similar magnitude as in the present study.<sup>17</sup> In this previous  
14  
15 292 analysis no sex differences in MRRs from all causes in association with diagnosed type  
16  
17 293 2 diabetes were observed, although significant detection of a sex differential may  
18  
19 294 have been precluded by a limited number of deaths among adults with diabetes.  
20  
21 295 Tönnies et al. calculated type-2-diabetes-associated MRR applying an illness-death  
22  
23 296 model, with estimates on diabetes prevalence and incidence derived from SHI claims  
24  
25 297 data and mortality rates of the general population from official death statistics. These  
26  
27 298 authors reported age-related decreases in MRRs, but considerably higher overall age-  
28  
29 299 adjusted MRR estimates, with higher estimates among women than men (3.0 vs.  
30  
31 300 2.3).<sup>10</sup> For comparison with this previous study which focused on the population 65-90  
32  
33 301 years of age in Germany we limited our analyses to the population aged 65-90 years  
34  
35 302 and found no differences in MRRs between women and men (1.47 versus 1.48).  
36  
37 303 Consistent with our results, nationwide studies in several other countries based on  
38  
39 304 diabetes registers or diabetes surveillance systems have reported a higher diabetes-  
40  
41 305 associated risk of all-cause mortality compared to general population or population  
42  
43 306 based controls.<sup>4-6 8 18</sup>  
44  
45 307 The Swedish national diabetes register and the Australian diabetes surveillance  
46  
47 308 showed that the excess risk of death in association with diagnosed type 2 diabetes  
48  
49 309 declined with increasing chronological age.<sup>6 8</sup> Although the present study could not  
50  
51 310 differentiate by type of diabetes, these results are in line with our findings, since type 2  
52  
53 311 diabetes accounts for the vast majority of diabetes cases among older adults. The age-  
54  
55 312 related decline in diabetes-associated excess risk of all-cause mortality might be due to  
56  
57 313 the different onsets of diabetes on the life span and the associated disease durations.  
58  
59 314 It may reflect increases in competing risk of death in older age groups as well as  
60  
315 survival disadvantage in association with increased diabetes duration. In addition, the



1  
2  
3 316 number of severe comorbidities in people with and without diabetes converges with  
4  
5 317 increasing age.

6  
7 318 With regard to sex differences in diabetes-associated relative risk or excess risk of all-  
8  
9 319 cause mortality, previous studies from other countries showed conflicting findings.<sup>4 5 8</sup>  
10  
11 320 Our age-specific estimates of diabetes-associated MRRs showed higher risk estimates  
12  
13 321 among women than among men for persons aged 50-79. This higher risk among  
14  
15 322 women declined with increasing age and diminished in the oldest age groups. This  
16  
17 323 consistent pattern is comparable to a study from Australia for 2004-2010 which  
18  
19 324 showed higher standardized mortality ratios (SMRs) in women than in men especially  
20  
21 325 for persons aged 50-79 years and very similar SMRs for women and men aged 80 years  
22  
23 326 or older (1.03 and 0.98).<sup>8</sup> A recently conducted systematic review and meta-analysis  
24  
25 327 including 49 studies with 86 prospective cohorts showed a combined MRR of 1.93 for  
26  
27 328 women and 1.74 for men with a pooled women-to-men RRR of 1.13.<sup>7</sup> However  
28  
29 329 estimates across studies ranged from 1.24 to 3.67 in women and from 1.32 to 3.13 in  
30  
31 330 men, pooled women-to-men RRR varied from 0.64 to 1.74.<sup>7</sup> Overall, differences in  
32  
33 331 study results regarding a sex differential in excess risk of diabetes-associated all-cause  
34  
35 332 mortality might, at least in part, be explained by differences in the age range,  
36  
37 333 underestimation of older people, time of follow-up and applied methods for risk  
38  
39 334 estimation.

40  
41 335 Prospective population-based studies are needed to obtain a deeper insight into the  
42  
43 336 role of sex difference in diabetes-associated mortality risks by taking relevant risk  
44  
45 337 factors such as lifestyle behavior and co-morbidities into account.

### 46 338 **Practical implications**

47 339 Our findings confirm that diagnosed diabetes in Germany is still associated with a  
48  
49 340 significantly elevated, several times higher risk of death among men and women, in  
50  
51 341 particular in younger and middle age. This emphasizes the need for effective primary  
52  
53 342 and secondary prevention. Further improvements in the early detection of diabetes,  
54  
55 343 particularly in younger ages, alongside with evidence based treatments, could  
56  
57 344 contribute to a reduction in excess mortality.

58 345 Our results open the perspective to close an important gap in diabetes surveillance in  
59  
60 346 Germany, as the SHI claims dataset appears to be suitable for close monitoring of

1  
2  
3 347 diabetes-associated excess risk of death, which is a key indicator in the national  
4  
5 348 diabetes surveillance system. In addition, the dataset will permit calculation of closely  
6  
7 349 related indicators, including the absolute number of deaths in association with  
8  
9 350 diabetes, and composite indicators of disease burden, including healthy life years and  
10  
11 351 the number of years lost in association with diabetes. Thus, including SHI claims data  
12  
13 352 dataset will harness the potential for improved health information systems as a basis  
14  
15 353 for the surveillance of diabetes and other noncommunicable diseases (NCD).

### 16 354 **Strengths and limitations**

17  
18 355 The main strength of our analysis is the completeness of the dataset, since about 90%  
19  
20 356 of the German population is covered by SHI. Mortality rates derived from the SHI  
21  
22 357 claims dataset showed good agreement with data from official death statistics, which  
23  
24 358 underlines the potential for generalization of our results. Our findings from sensitivity  
25  
26 359 analyses support the validity of the data. We consistently showed an excess risk of all-  
27  
28 360 cause mortality in association with diagnosed diabetes based on varying case  
29  
30 361 definitions for diabetes.

31 362 Taken together, our results demonstrate that the DaTraV dataset could essentially  
32  
33 363 contribute to close current gaps in diabetes surveillance with an overall good  
34  
35 364 documentation quality of diabetes and the advantage to consider inpatient as well as  
36  
37 365 outpatient data for case definition.

38 366 A great disadvantage of routine datasets based solely on documented diagnoses is that  
39  
40 367 no information about undiagnosed morbidity can be drawn. National surveys with an  
41  
42 368 additional HbA1c measurement in blood samples of participants show a relevant  
43  
44 369 proportion of undiagnosed diabetes. Although this proportion has decreased over  
45  
46 370 time, it is still relatively high<sup>19</sup> and at the same time is related to a slightly higher  
47  
48 371 excess mortality than diagnosed diabetes.<sup>17 20</sup> For this reason the current routine data  
49  
50 372 analysis is likely to underestimate the excess mortality in diabetes.

51 373 There are a number of limitations which arise from the specific construction of the  
52  
53 374 DaTraV dataset, which originally served economic but not research purposes. We had  
54  
55 375 to determine cases of diabetes in the data in 2013 only, in order to identify persons  
56  
57 376 who died in 2014 among persons with and without diabetes. This implies that those  
58  
59 377 who died with newly documented diabetes in 2014 are not detectable in the data as  
60

1  
2  
3 378 diabetes cases and hence will be counted as persons without diabetes. We cannot  
4  
5 379 exclude that this also contributed to an underestimation of diabetes-associated excess  
6  
7 380 mortality. Since diabetes is a chronic disease, and long-term complications account for  
8  
9 381 the majority of diabetes-associated deaths, we assume that this had only little impact  
10  
11 382 on our results. The planned revision of the Data Transparency Regulations in Germany  
12  
13 383 could help to overcome current shortcomings.  
14  
15 384 Furthermore, the currently missing stratification of the dataset according to  
16  
17 385 geographic region and social status or social deprivation should be possible in the  
18  
19 386 future, hence we will be able to analyze and compare mortality trends within Germany  
20  
21 387 as well as at a national level with other countries.  
22  
23 388 The present study included adults 30 years of age and older, and type 2 diabetes is  
24  
25 389 likely to account for most cases of documented diabetes. Nevertheless, it will be  
26  
27 390 important to overcome current limitations to differentiate between major types of  
28  
29 391 diabetes in claims data. The main problem is the frequent coding of an unspecific  
30  
31 392 diabetes (ICD-10: E14.-) or even diagnoses that are mutually exclusive (E10.- and E11.-)  
32  
33 393 in the data.<sup>21</sup> A recent analysis of the here used dataset has demonstrated that  
34  
35 394 including information on medication may improve assignment of unspecific diabetes  
36  
37 395 codes to type 2 diabetes.<sup>22</sup> Among children and adolescents type 1 diabetes is the  
38  
39 396 predominant type of diabetes. As insulin treatment is required here, documented  
40  
41 397 insulin use is an essential part of the case definition for type 1 diabetes, and also helps  
42  
43 398 to clarify diabetes definition.<sup>23</sup>

## 42 399 **Conclusions**

44 400 Diabetes-related risk of death is a key indicator for monitoring diabetes epidemiology  
45  
46 401 and quality of diabetes care. Establishing sustainable time trends for this indicator as  
47  
48 402 part of the national diabetes surveillance system in Germany is of great need, but was  
49  
50 403 so far precluded by the lack of a valid and timely accessible dataset. Results of the  
51  
52 404 present study demonstrate that analysis of SHI claims data may provide a solution in  
53  
54 405 closing this information gap. Further research is needed to analyze and to improve the  
55  
56 406 quality of the data, in particular with regard to case definitions. In this case, the SHI  
57  
58 407 claims data could also serve to calculate and monitor the absolute number of diabetes-  
59  
60 408 associated deaths as well as composite indicators of disease burden, such as diabetes-

1  
2  
3 409 associated healthy life years and years of life lost. Stratification of SHI claims data  
4  
5 410 according to geographic region and social status or social deprivation will be possible  
6  
7 411 in the future, hence we will be able to analyze and compare diabetes-associated  
8  
9 412 mortality trends within Germany but also with international developments.<sup>3</sup> This will  
10  
11 413 strengthen surveillance activities for the prevention and control of diabetes and other  
12  
13 414 major NCD at a national level and also enhance international collaboration in diabetes  
14  
15 415 and NCD surveillance and burden of disease estimates.  
16  
17  
18  
19  
20  
21  
22  
23  
24  
25  
26  
27  
28  
29  
30  
31  
32  
33  
34  
35  
36  
37  
38  
39  
40  
41  
42  
43  
44  
45  
46  
47  
48  
49  
50  
51  
52  
53  
54  
55  
56  
57  
58  
59  
60

For peer review only

417 **Footnotes**

418

419 **Contributors:** CS, JB and CH designed the study. CS, LR and JB performed the analysis. CS, CSN  
420 and JB wrote the initial version of the manuscript. LR, RP and TZ revised the manuscript. All  
421 authors read and approved the final manuscript. All authors had full access to all of the data  
422 (including statistical reports and tables) in the study and can take responsibility for the  
423 integrity of the data and the accuracy of the data analysis. CS is the lead author and guarantor.

424

425 **Transparency declaration:** The lead author affirms that this manuscript is an honest, accurate,  
426 and transparent account of the study being reported; that no important aspects of the study  
427 have been omitted; and that any discrepancies from the study as planned (and, if relevant,  
428 registered) have been explained.

429

430 **Funding:** The project to establish national diabetes surveillance at the Robert Koch Institute is  
431 funded by the German Federal Ministry of Health (funding code: GE 2015 03 23). The project  
432 to promote and further develop the use of external sources of data to secure (establish and  
433 expand) national level diabetes surveillance is funded by the Federal Ministry of Health  
434 (funding code: GE 2019 03 05).

435

436 **Competing interests:** All authors have completed the Unified Competing Interest form at  
437 [www.icmje.org/coi\\_disclosure.pdf](http://www.icmje.org/coi_disclosure.pdf) (available on request from the corresponding author) and  
438 declare: no support from any organisation for the submitted work, no financial relationships  
439 with any organisations that might have an interest in the submitted work in the previous three  
440 years no other relationships or activities that could appear to have influenced the submitted  
441 work.

442 **Ethics approval:** This study was not approved by a research ethics committee, because our  
443 study did not meet the criteria for human subjects research.

444 **Data sharing:** The SQL code for requesting aggregated data and statistical codes available from  
445 the corresponding author at [schmidtchri@rki.de](mailto:schmidtchri@rki.de).

447 **References**

- 448 1. NCD Risk Factor Collaboration (NCD-RisC). Worldwide trends in diabetes since 1980: a  
449 pooled analysis of 751 population-based studies with 4.4 million participants. *Lancet*  
450 (*London, England*) 2016;387(10027):1513-30. doi: 10.1016/s0140-6736(16)00618-8  
451 [published Online First: 2016/04/12]
- 452 2. Williams J, Loeffler M, Metrics ftlfH, et al. Global Trends in Type 2 Diabetes, 2007-2017.  
453 *JAMA* 2019;322(16):1542-42. doi: 10.1001/jama.2019.16074
- 454 3. Harding JL, Pavkov ME, Magliano DJ, et al. Global trends in diabetes complications: a review  
455 of current evidence. *Diabetologia* 2019;62(1):3-16. doi: 10.1007/s00125-018-4711-2
- 456 4. Green A, Sortsø C, Jensen PB, et al. Incidence, morbidity, mortality, and prevalence of  
457 diabetes in Denmark, 2000-2011: results from the Diabetes Impact Study 2013. *Clin*  
458 *Epidemiol* 2015;7:421-30. doi: 10.2147/CLEP.S88577
- 459 5. Read SH, Kerssens JJ, McAllister DA, et al. Trends in type 2 diabetes incidence and mortality  
460 in Scotland between 2004 and 2013. *Diabetologia* 2016;59(10):2106-13. doi:  
461 10.1007/s00125-016-4054-9 [published Online First: 2016/07/29]
- 462 6. Tancredi M, Rosengren A, Svensson AM, et al. Excess Mortality among Persons with Type 2  
463 Diabetes. *The New England journal of medicine* 2015;373(18):1720-32. doi:  
464 10.1056/NEJMoa1504347 [published Online First: 2015/10/29]
- 465 7. Wang Y, O'Neil A, Jiao Y, et al. Sex differences in the association between diabetes and risk  
466 of cardiovascular disease, cancer, and all-cause and cause-specific mortality: a  
467 systematic review and meta-analysis of 5,162,654 participants. *BMC Medicine*  
468 2019;17(1):136. doi: 10.1186/s12916-019-1355-0
- 469 8. Harding JL, Shaw JE, Peeters A, et al. Mortality Trends Among People With Type 1 and Type  
470 2 Diabetes in Australia: 1997–2010. *Diabetes care* 2014;DC\_140096. doi:  
471 10.2337/dc14-0096
- 472 9. Heidemann C, Scheidt-Nave C. Prevalence, incidence and mortality of diabetes mellitus in  
473 adults in Germany – A review in the framework of the Diabetes Surveillanc: Robert  
474 Koch-Institut, Epidemiologie und Gesundheitsberichterstattung, 2017.
- 475 10. Tönnies T, Hoyer A, Brinks R. Excess mortality for people diagnosed with type 2 diabetes in  
476 2012 – Estimates based on claims data from 70 million Germans. *Nutrition,*  
477 *Metabolism and Cardiovascular Diseases* 2018;28(9):887-91. doi:  
478 <https://doi.org/10.1016/j.numecd.2018.05.008>
- 479 11. German Institute of Medical Documentation and Information (DIMDI). Health Care Data.  
480 <https://www.dimdi.de/dynamic/en/further-services/health-care-data/>.
- 481 12. Busse R, Blümel M, Knieps F, et al. Statutory health insurance in Germany: a health system  
482 shaped by 135 years of solidarity, self-governance, and competition. *The Lancet*  
483 2017;390(10097):882-97. doi: 10.1016/S0140-6736(17)31280-1
- 484 13. Schmidt C, Heidemann C, Rommel A, et al. Secondary data in diabetes surveillance – co-  
485 operation projects and definition of references on the documented prevalence of  
486 diabetes. *Journal of Health Monitoring* 2019;4(2):50--63. doi:  
487 <http://dx.doi.org/10.25646/5988>
- 488 14. Schubert I, Ihle P, Koster I. [Internal confirmation of diagnoses in routine statutory health  
489 insurance data: concept with examples and case definitions]. *Gesundheitswesen*  
490 (*Bundesverband der Ärzte des Öffentlichen Gesundheitsdienstes (Germany)*)  
491 2010;72(6):316-22. doi: 10.1055/s-0030-1249688 [published Online First: 2010/05/19]
- 492 15. Statistisches Bundesamt. Fachserie 12 Reihe 4. Gesundheit. Todesursachen in Deutschland  
493 2014. [https://www.destatis.de/GPStatistik/receive/DEHeft\\_heft\\_00035170](https://www.destatis.de/GPStatistik/receive/DEHeft_heft_00035170). In  
494 German.
- 495 16. Fang J. Using SAS® Procedures FREQ, GENMOD, LOGISTIC, and PHREG to Estimate Adjusted  
496 Relative Risks – A Case Study. SAS Global Forum, 2011.

- 1  
2  
3 497 17. Röckl S, Brinks R, Baumert J, et al. All-cause mortality in adults with and without type 2  
4 498 diabetes: findings from the national health monitoring in Germany. *BMJ open diabetes*  
5 499 *research & care* 2017;5(1):e000451-e51. doi: 10.1136/bmjdr-2017-000451  
6 500  
7 501 18. Gregg EW, Cheng YJ, Srinivasan M, et al. Trends in cause-specific mortality among adults  
8 502 with and without diagnosed diabetes in the USA: an epidemiological analysis of linked  
9 503 national survey and vital statistics data. *The Lancet* 2018;391(10138):2430-40. doi:  
10 504 10.1016/S0140-6736(18)30314-3  
11 505 19. Heidemann C, Du Y, Paprott R, et al. Temporal changes in the prevalence of diagnosed  
12 506 diabetes, undiagnosed diabetes and prediabetes: findings from the German Health  
13 507 Interview and Examination Surveys in 1997-1999 and 2008-2011. *Diabetic medicine : a*  
14 508 *journal of the British Diabetic Association* 2016;33(10):1406-14. doi:  
15 509 10.1111/dme.13008 [published Online First: 2015/10/27]  
16 510 20. Paprott R, Schaffrath Rosario A, Busch MA, et al. Association Between Hemoglobin A1c and  
17 511 All-Cause Mortality: Results of the Mortality Follow-up of the German National Health  
18 512 Interview and Examination Survey 1998. *Diabetes care* 2015;38(2):249-56. doi:  
19 513 10.2337/dc14-1787  
20 514 21. Tamayo T, Brinks R, Hoyer A, et al. The Prevalence and Incidence of Diabetes in Germany.  
21 515 *Dtsch Arztebl Int* 2016;113(11):177-82. doi: 10.3238/arztebl.2016.0177 [published  
22 516 Online First: 2016/04/28]  
23 517 22. Thoren Ct, Schwalm A, Mostardt S, et al. Can Routine Data be used to Determine the  
24 518 Target Population of Patients with Type 2 Diabetes in Early Benefit Assessments in  
25 519 Germany? *Gesundheitswesen (Bundesverband der Ärzte des Öffentlichen*  
26 520 *Gesundheitsdienstes (Germany))* (EFirst) doi: 10.1055/a-0948-5301 [published Online  
27 521 First: 26.08.2019]  
28 522 23. Bohn B, Schwandt A, Ihle P, et al. Hospital admission in children and adolescents with or  
29 523 without type 1 diabetes from Germany: An analysis of statutory health insurance data  
30 524 on 12 million subjects. *Pediatric diabetes* 2018;19(4):721-26. doi: 10.1111/pedi.12621  
31 525 [published Online First: 2017/12/12]  
32  
33  
34  
35  
36  
37  
38  
39  
40  
41  
42  
43  
44  
45  
46  
47  
48  
49  
50  
51  
52  
53  
54  
55  
56  
57  
58  
59  
60

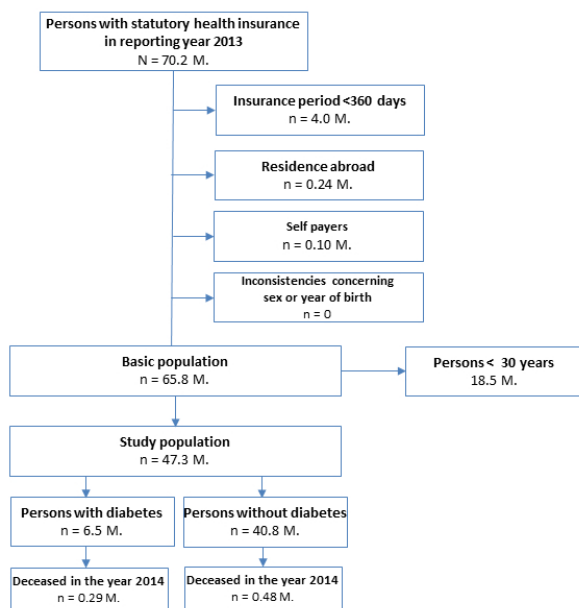

Figure 1 Flow chart of selection of study population with excluding criteria and sample sizes.

Figure 1 Flow chart of selection of study population with excluding criteria and sample sizes

254x190mm (96 x 96 DPI)



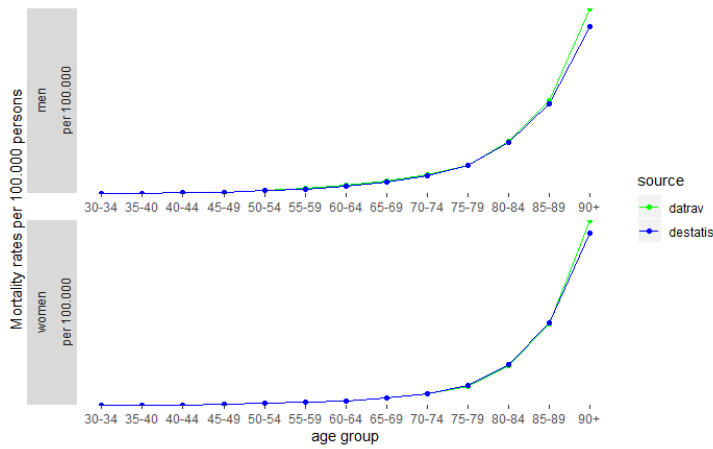

Figure 2 Age-specific mortality rates per 100,000 persons stratified by sex for the year 2014 as obtained from official cause of death statistics (Destatis) and claims data (Datrav). The blue line indicates results from official statistics; the green line indicates results from the DaTraV dataset.

Figure 2 Age-specific mortality rates per 100,000 persons stratified by sex for the year 2014 as obtained from official cause of death statistics (Destatis) and claims data (Datrav). The blue line indicates results from official statistics; the green line indicates results from the DaTraV dataset.

254x190mm (96 x 96 DPI)

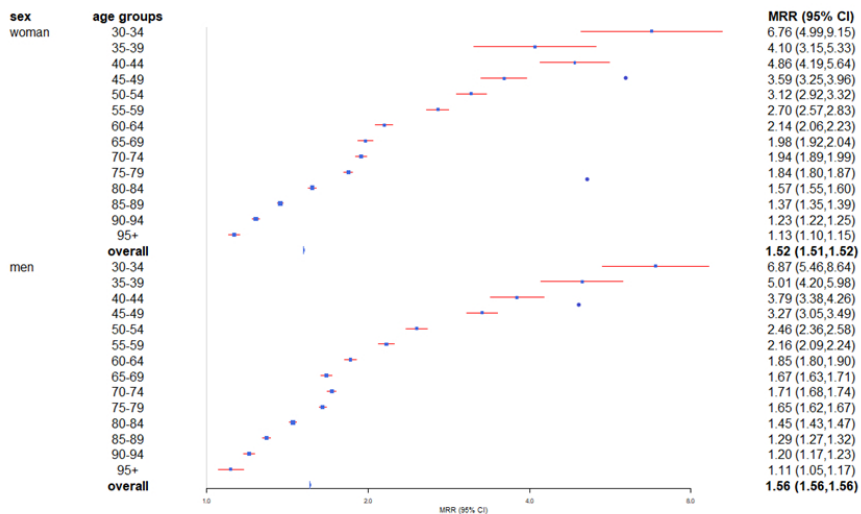

**Figure 3** MRRs for persons with diabetes compared to persons without diabetes by sex and age groups. Overall estimates are adjusted using all displayed age groups.

Figure 3 MRRs for persons with diabetes compared to persons without diabetes by sex and age groups. Overall estimates are adjusted using all displayed age groups.

254x190mm (96 x 96 DPI)

STROBE Statement—Checklist of items that should be included in reports of *cohort studies*

|                              | Item No | Recommendation                                                                                                                                                                                    | Page No |
|------------------------------|---------|---------------------------------------------------------------------------------------------------------------------------------------------------------------------------------------------------|---------|
| <b>Title and abstract</b>    | 1       | (a) Indicate the study's design with a commonly used term in the title or the abstract                                                                                                            | 2       |
|                              |         | (b) Provide in the abstract an informative and balanced summary of what was done and what was found                                                                                               | 2       |
| <b>Introduction</b>          |         |                                                                                                                                                                                                   |         |
| Background/rationale         | 2       | Explain the scientific background and rationale for the investigation being reported                                                                                                              | 4,5     |
| Objectives                   | 3       | State specific objectives, including any prespecified hypotheses                                                                                                                                  | 5       |
| <b>Methods</b>               |         |                                                                                                                                                                                                   |         |
| Study design                 | 4       | Present key elements of study design early in the paper                                                                                                                                           | 2,5-6   |
| Setting                      | 5       | Describe the setting, locations, and relevant dates, including periods of recruitment, exposure, follow-up, and data collection                                                                   | 2,5-6   |
| Participants                 | 6       | (a) Give the eligibility criteria, and the sources and methods of selection of participants. Describe methods of follow-up                                                                        | 6, 7    |
|                              |         | (b) For matched studies, give matching criteria and number of exposed and unexposed                                                                                                               | NA      |
| Variables                    | 7       | Clearly define all outcomes, exposures, predictors, potential confounders, and effect modifiers. Give diagnostic criteria, if applicable                                                          | 6,7     |
| Data sources/<br>measurement | 8*      | For each variable of interest, give sources of data and details of methods of assessment (measurement). Describe comparability of assessment methods if there is more than one group              | 5,6     |
| Bias                         | 9       | Describe any efforts to address potential sources of bias                                                                                                                                         | 8       |
| Study size                   | 10      | Explain how the study size was arrived at                                                                                                                                                         | 6       |
| Quantitative variables       | 11      | Explain how quantitative variables were handled in the analyses. If applicable, describe which groupings were chosen and why                                                                      | 8       |
| Statistical methods          | 12      | (a) Describe all statistical methods, including those used to control for confounding                                                                                                             | 8       |
|                              |         | (b) Describe any methods used to examine subgroups and interactions                                                                                                                               | 8       |
|                              |         | (c) Explain how missing data were addressed                                                                                                                                                       | NA      |
|                              |         | (d) If applicable, explain how loss to follow-up was addressed                                                                                                                                    | NA      |
|                              |         | (e) Describe any sensitivity analyses                                                                                                                                                             | 8,11    |
| <b>Results</b>               |         |                                                                                                                                                                                                   |         |
| Participants                 | 13*     | (a) Report numbers of individuals at each stage of study—eg numbers potentially eligible, examined for eligibility, confirmed eligible, included in the study, completing follow-up, and analysed | 6       |
|                              |         | (b) Give reasons for non-participation at each stage                                                                                                                                              | NA      |
|                              |         | (c) Consider use of a flow diagram                                                                                                                                                                | 6       |
| Descriptive data             | 14*     | (a) Give characteristics of study participants (eg demographic, clinical, social) and information on exposures and potential confounders                                                          | 8-10    |
|                              |         | (b) Indicate number of participants with missing data for each variable of interest                                                                                                               | NA      |
|                              |         | (c) Summarise follow-up time (eg, average and total amount)                                                                                                                                       | NA      |
| Outcome data                 | 15*     | Report numbers of outcome events or summary measures over time                                                                                                                                    | 10      |

|    |                          |    |                                                                                                                                                                                                              |       |
|----|--------------------------|----|--------------------------------------------------------------------------------------------------------------------------------------------------------------------------------------------------------------|-------|
| 1  | Main results             | 16 | (a) Give unadjusted estimates and, if applicable, confounder-adjusted estimates and their precision (eg, 95% confidence interval). Make clear which confounders were adjusted for and why they were included | 10,11 |
| 2  |                          |    | (b) Report category boundaries when continuous variables were categorized                                                                                                                                    | NA    |
| 3  |                          |    | (c) If relevant, consider translating estimates of relative risk into absolute risk for a meaningful time period                                                                                             | NA    |
| 4  |                          |    |                                                                                                                                                                                                              |       |
| 5  |                          |    |                                                                                                                                                                                                              |       |
| 6  |                          |    |                                                                                                                                                                                                              |       |
| 7  |                          |    |                                                                                                                                                                                                              |       |
| 8  |                          |    |                                                                                                                                                                                                              |       |
| 9  | Other analyses           | 17 | Report other analyses done—eg analyses of subgroups and interactions, and sensitivity analyses                                                                                                               | 11,12 |
| 10 |                          |    |                                                                                                                                                                                                              |       |
| 11 | <b>Discussion</b>        |    |                                                                                                                                                                                                              |       |
| 12 |                          |    |                                                                                                                                                                                                              |       |
| 13 | Key results              | 18 | Summarise key results with reference to study objectives                                                                                                                                                     | 12-14 |
| 14 |                          |    |                                                                                                                                                                                                              |       |
| 15 | Limitations              | 19 | Discuss limitations of the study, taking into account sources of potential bias or imprecision. Discuss both direction and magnitude of any potential bias                                                   | 15,16 |
| 16 |                          |    |                                                                                                                                                                                                              |       |
| 17 | Interpretation           | 20 | Give a cautious overall interpretation of results considering objectives, limitations, multiplicity of analyses, results from similar studies, and other relevant evidence                                   | 12-14 |
| 18 |                          |    |                                                                                                                                                                                                              |       |
| 19 |                          |    |                                                                                                                                                                                                              |       |
| 20 | Generalisability         | 21 | Discuss the generalisability (external validity) of the study results                                                                                                                                        | 15,16 |
| 21 |                          |    |                                                                                                                                                                                                              |       |
| 22 | <b>Other information</b> |    |                                                                                                                                                                                                              |       |
| 23 | Funding                  | 22 | Give the source of funding and the role of the funders for the present study and, if applicable, for the original study on which the present article is based                                                | 18    |
| 24 |                          |    |                                                                                                                                                                                                              |       |
| 25 |                          |    |                                                                                                                                                                                                              |       |

\*Give information separately for exposed and unexposed groups.

**Note:** An Explanation and Elaboration article discusses each checklist item and gives methodological background and published examples of transparent reporting. The STROBE checklist is best used in conjunction with this article (freely available on the Web sites of PLoS Medicine at <http://www.plosmedicine.org/>, Annals of Internal Medicine at <http://www.annals.org/>, and Epidemiology at <http://www.epidem.com/>). Information on the STROBE Initiative is available at <http://www.strobe-statement.org>.

# BMJ Open

## Excess mortality in adults with documented diabetes in Germany – Routine data analysis of all insurance claims in Germany 2013-2014

|                                 |                                                                                                                                                                                                                                                                                                                                                                                                                                                                                                                                                                                                                                                                      |
|---------------------------------|----------------------------------------------------------------------------------------------------------------------------------------------------------------------------------------------------------------------------------------------------------------------------------------------------------------------------------------------------------------------------------------------------------------------------------------------------------------------------------------------------------------------------------------------------------------------------------------------------------------------------------------------------------------------|
| Journal:                        | <i>BMJ Open</i>                                                                                                                                                                                                                                                                                                                                                                                                                                                                                                                                                                                                                                                      |
| Manuscript ID                   | bmjopen-2020-041508.R1                                                                                                                                                                                                                                                                                                                                                                                                                                                                                                                                                                                                                                               |
| Article Type:                   | Original research                                                                                                                                                                                                                                                                                                                                                                                                                                                                                                                                                                                                                                                    |
| Date Submitted by the Author:   | 16-Dec-2020                                                                                                                                                                                                                                                                                                                                                                                                                                                                                                                                                                                                                                                          |
| Complete List of Authors:       | Schmidt, Christian; Robert Koch Institute, Department of Epidemiology and Health Monitoring<br>Reitzle, Lukas; Robert Koch Institute, Department of Epidemiology and Health Monitoring<br>Heidemann, Christin; Robert Koch Institute, Department of Epidemiology and Health Monitoring<br>Paprott, Rebecca; Robert Koch Institute, Department of Epidemiology and Health Monitoring<br>Ziese, Thomas; Robert Koch Institute, Department of Epidemiology and Health Monitoring<br>Scheidt-Nave, Christa; Robert Koch Institute, Dept. of Epidemiology and Health Monitoring<br>Baumert, Jens; Robert Koch Institute, Department of Epidemiology and Health Monitoring |
| <b>Primary Subject Heading</b>: | Epidemiology                                                                                                                                                                                                                                                                                                                                                                                                                                                                                                                                                                                                                                                         |
| Secondary Subject Heading:      | Diabetes and endocrinology                                                                                                                                                                                                                                                                                                                                                                                                                                                                                                                                                                                                                                           |
| Keywords:                       | General diabetes < DIABETES & ENDOCRINOLOGY, EPIDEMIOLOGY, PUBLIC HEALTH                                                                                                                                                                                                                                                                                                                                                                                                                                                                                                                                                                                             |
|                                 |                                                                                                                                                                                                                                                                                                                                                                                                                                                                                                                                                                                                                                                                      |

SCHOLARONE™  
Manuscripts

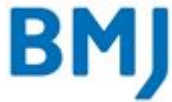

I, the Submitting Author has the right to grant and does grant on behalf of all authors of the Work (as defined in the below author licence), an exclusive licence and/or a non-exclusive licence for contributions from authors who are: i) UK Crown employees; ii) where BMJ has agreed a CC-BY licence shall apply, and/or iii) in accordance with the terms applicable for US Federal Government officers or employees acting as part of their official duties; on a worldwide, perpetual, irrevocable, royalty-free basis to BMJ Publishing Group Ltd ("BMJ") its licensees and where the relevant Journal is co-owned by BMJ to the co-owners of the Journal, to publish the Work in this journal and any other BMJ products and to exploit all rights, as set out in our [licence](#).

The Submitting Author accepts and understands that any supply made under these terms is made by BMJ to the Submitting Author unless you are acting as an employee on behalf of your employer or a postgraduate student of an affiliated institution which is paying any applicable article publishing charge ("APC") for Open Access articles. Where the Submitting Author wishes to make the Work available on an Open Access basis (and intends to pay the relevant APC), the terms of reuse of such Open Access shall be governed by a Creative Commons licence – details of these licences and which [Creative Commons](#) licence will apply to this Work are set out in our licence referred to above.

Other than as permitted in any relevant BMJ Author's Self Archiving Policies, I confirm this Work has not been accepted for publication elsewhere, is not being considered for publication elsewhere and does not duplicate material already published. I confirm all authors consent to publication of this Work and authorise the granting of this licence.

1  
2  
3  
4  
5  
6  
7  
8  
9  
10  
11  
12  
13  
14  
15  
16  
17  
18  
19  
20  
21  
22  
23  
24  
25  
26  
27  
28  
29  
30  
31  
32  
33  
34  
35  
36  
37  
38  
39  
40  
41  
42  
43  
44  
45  
46  
47  
48  
49  
50  
51  
52  
53  
54  
55  
56  
57  
58  
59  
60

1 **Excess mortality in adults with documented diabetes in Germany – Routine data**  
2 **analysis of all insurance claims in Germany 2013-2014**

3 Christian Schmidt, research associate, Lukas Reitzle, research associate, Christin Heidemann  
4 senior research associate, Rebecca Paprott, research associate, Thomas Ziese, head of unit  
5 health reporting, Christa Scheidt-Nave, head of unit physical health, Jens Baumert, senior  
6 research associate

7 All authors: Department of Epidemiology and Health Monitoring, Robert Koch Institute, Berlin,  
8 Germany

9 **Corresponding author:**

10 Christian Schmidt  
11 Tel. +4930187543269; E-Mail: [schmidtchri@rki.de](mailto:schmidtchri@rki.de)  
12 Robert Koch Institut, Berlin, Germany  
13 ISNI: 0000000109403744

14  
15 **Email-Addresses of Authors:**

16 Lukas Reitzle: [reitzlel@rki.de](mailto:reitzlel@rki.de)  
17 Christin Heidemann: [heidemannc@rki.de](mailto:heidemannc@rki.de)  
18 Rebecca Paprott: [paprottr@rki.de](mailto:paprottr@rki.de)  
19 Thomas Ziese: [zieset@rki.de](mailto:zieset@rki.de)  
20 Christa Scheidt-Nave: [scheidt-navec@rki.de](mailto:scheidt-navec@rki.de)  
21 Jens Baumert: [baumertj@rki.de](mailto:baumertj@rki.de)

22  
23 **Keywords:** Diabetes mellitus, Mortality, Epidemiology, Surveillance, Claims data

1  
2  
3 **25 Abstract**

4  
5 26 Objectives

6  
7 27 Little is known about the age-specific excess mortality pattern of people with diagnosed  
8 28 diabetes in Germany. Thus, our goal was to determine the excess mortality in diagnosed  
9 29 diabetes overall and stratified by age and sex based on claims data.

10  
11 30 Design

12  
13 31 Routine data analysis using a claims dataset from all statutory health insured persons in  
14 32 Germany in 2013, which accounts for about 90% of the population.

15  
16 33 Participants

17  
18 34 We included persons who lived in Germany, were insured at least 360 days, were not self-  
19 35 paying any health services and were aged 30 years or older leading to a total number of 47.3  
20 36 million insured persons for analyses.

21  
22 37 Exposure

23  
24 38 Diabetes was determined by ICD-10 codes E10 to E14, which were documented in 2013 in at  
25 39 least two quarters on an outpatient setting or at least once on an inpatient setting.

26  
27 40 Outcome measures

28  
29 41 The vital status in the study population was drawn from the claims dataset for the year 2014.  
30 42 We derived the excess mortality estimated as an age-adjusted mortality rate ratio (MRR) by  
31 43 sex and for age groups using a Poisson model.

32  
33 44 Main Results

34  
35 45 We found age-adjusted MRRs (95% CI) for diabetes of 1.52 (1.51 to 1.52) for women and 1.56  
36 46 (1.56 to 1.56) for men. These figures declined with increasing age and were highest for age 30  
37 47 to 34 years with 6.76 (4.99 to 9.15) for women and 6.87 (5.46 to 8.64) for men and lowest for  
38 48 age 95 years and older with 1.13 (1.10 to 1.15) for women and 1.11 (1.05 to 1.17) for men.

39  
40 49 Conclusions

41  
42 50 We derived deeply age-stratified figures on excess mortality in diabetes for Germany.  
43 51 Establishing a sustainable analysis of excess mortality is aimed at within the framework of  
44 52 diabetes surveillance.



1  
2  
3 54 **Strengths and limitations of this study**  
4

- 5 55 • This is the first study in Germany, which analyses excess mortality of diabetes  
6 on the basis of routine data covering almost the entire German population.  
7 56  
8  
9 57 • The completeness of the study data in terms of deaths and documented  
10 diagnosis allows calculating nearly unbiased and deep stratified  
11 58  
12 59 diabetes-related mortality.  
13  
14 60 • We have not distinguished the type of diabetes because routine data contain  
15 implausible double diagnoses of type 1 and type 2 diabetes in the same person.  
16 61  
17 62 • The study data are limited to documented diagnoses, i.e. no information about  
18 undiagnosed morbidity is available.  
19 63  
20 64 • In principle, the study data allows a continuous assessment of changes in  
21 mortality, which is suitable for public health surveillance.  
22 65  
23  
24  
25  
26  
27  
28  
29  
30  
31  
32  
33  
34  
35  
36  
37  
38  
39  
40  
41  
42  
43  
44  
45  
46  
47  
48  
49  
50  
51  
52  
53  
54  
55  
56  
57  
58  
59  
60

## 67 **Introduction**

68 Diabetes mellitus is a chronic metabolic disease of high public health impact in  
69 Germany and worldwide.<sup>1</sup> According to the Global Burden of Disease Study 2017  
70 diabetes ranks among the top 10 leading causes of death globally.<sup>2</sup> Available treatment  
71 with insulin and glucose lowering drugs has greatly reduced the risk of acute  
72 complications and premature mortality. Nevertheless, persons with diabetes still have  
73 a higher age-adjusted risk of death compared to persons without diabetes mainly  
74 because of an increased risk of micro- and macrovascular complications.<sup>3</sup>

75 Monitoring diabetes-related mortality over time is an important part of national  
76 diabetes surveillance activities, as the age-specific excess risk of death among persons  
77 with diabetes compared to those without diabetes serves as an indicator of quality of  
78 diabetes care. Some countries, such as Sweden, Denmark and Scotland have  
79 established national diabetes registers, and along with a legal basis for individual  
80 health data linkage, these data allow a reliable assessment of diabetes-related  
81 mortality in comparison to the general population<sup>4,5</sup> or population-based controls.<sup>6</sup>  
82 Results from these countries consistently demonstrate a significantly higher risk of  
83 death in association with diabetes, but greatly vary with regard to the overall  
84 magnitude of excess risk as well as sex differences. A recent meta-analysis of diabetes-  
85 related all-cause mortality based on 86 prospective cohorts showed a higher pooled  
86 adjusted relative risk of death among women than men (1.93 vs. 1.74 ).<sup>7</sup> The studies  
87 from Sweden as well as a further study from Australia have been age disaggregated,  
88 indicating that excess mortality among persons with type 2 diabetes significantly  
89 decreases with increasing chronological age.<sup>6,8</sup>

90 In Germany, a national diabetes surveillance system is currently being established at  
91 the Robert Koch Institute as the national public health institute. One of the main goals  
92 is to cover the diabetes-related mortality continuously ([www.diabsurv.rki.de](http://www.diabsurv.rki.de)). Over the  
93 past 20-years a number of epidemiological studies in Germany have provided  
94 estimates of mortality rate ratios (MRRs) comparing mortality rates among persons  
95 with and without diabetes. The results from these studies vary due to differences in  
96 study design and study populations, methodological issues, regional vs. national data,  
97 follow-up time, and insight from age- and sex-stratified analyses is limited due to the

1  
2  
3 98 small number of observations.<sup>9</sup> In addition to these population-based estimates, a  
4  
5 99 recent study estimated diabetes-related MRRs for the population 65-90 years of age in  
6  
7 100 Germany based on mathematical modeling using official death statistics, and  
8  
9 101 prevalence and incidence estimates derived from statutory health insurance (SHI)  
10  
11 102 claims data.<sup>10</sup> Due to partly conflicting findings stated above, further research is  
12  
13 103 needed to increase knowledge on diabetes-related excess mortality, especially with  
14  
15 104 respect to differences in magnitude by age, sex, region and time trend.

16  
17 105 Information on mortality has recently been added to a SHI claims dataset with  
18  
19 106 complete records of all insured persons in Germany. As almost 90% of the population  
20  
21 107 is covered by statutory health insurance, this data source has enormous potential for  
22  
23 108 public health research, including detailed analyses of mortality patterns. The present  
24  
25 109 study for the first time used outpatient and inpatient SHI claims data drawn from this  
26  
27 110 dataset to analyse observed mortality rates for adults in Germany with and without  
28  
29 111 diagnosed diabetes. Up to now, diabetes-related MRRs from the age of 30 years in 5-  
30  
31 112 years age bands have not been available for the German population. Against this  
32  
33 113 background our main aim was to provide for the first time estimates of MRRs related  
34  
35 114 to diabetes within strata of narrow age bands and sex for Germany and thus adds  
36  
37 115 important knowledge in diabetes-related excess mortality. Deeply stratified mortality  
38  
39 116 rates based on valid data are important for the surveillance of diabetes in Germany, as  
40  
41 117 they allow a comparison over time and with other countries.

## 41 **Methods**

### 42 **Source of data**

43  
44  
45 120 We used the SHI claims research dataset hosted by the German Institute for Medical  
46  
47 121 Documentation and Information (DIMDI).<sup>11</sup> According to the Data Transparency  
48  
49 122 Regulation Act (DaTraV) 2012 this dataset has been made accessible to authorized  
50  
51 123 health researchers. Originally, these data were collected within the scope of the  
52  
53 124 German morbidity-based risk-adjustment scheme.<sup>12</sup> The dataset includes medical data  
54  
55 125 from approximately 70 million people covered by SHI, which are about 90% of the  
56  
57 126 German population. The DaTraV data contain complete data on outpatient and  
58  
59 127 inpatient diagnoses as well as prescribed drugs and the vital status.<sup>11</sup> Therefore, the  
60  
128 data can be analyzed across all sectors of care and providers within the SHI system. For

1  
2  
3 129 reasons of data protection, there is no direct access to these stored individual data.  
4  
5 130 Analyses are limited to aggregate data, which can be requested from the DIMDI data  
6  
7 131 processing centre. A research question needs to be submitted together with an  
8  
9 132 analytical scheme or a syntax query for data analysis. The request has to be approved  
10  
11 133 by the data processing centre and the aggregated results are checked and transmitted  
12  
13 134 to the applicant.

14 135 We developed an SQL script for the analysis of mortality rates among persons with and  
15  
16 136 without diabetes based on DaTraV datasets 2013 and 2014. As described in detail  
17  
18 137 below, the SQL script had to take into account several specifics of the data, including  
19  
20 138 assessment of vital status and the case definition for diabetes.<sup>13</sup>

### 21 22 139 **Study population**

23  
24 140 Information from more than 70 million SHI persons was available for the year 2013  
25  
26 141 (Figure 1). In addition to the individual SHI identification number, the year of birth and  
27  
28 142 sex were checked for unique assignment to the insured person. Persons with an  
29  
30 143 insured period of less than 360 days, persons who cover at least partly their own  
31  
32 144 health expenditure and persons with main residence abroad were excluded from the  
33  
34 145 analysis, because this may have precluded documentation of diabetes within the year  
35  
36 146 2013.

37 147 After these exclusions but mainly due to an insurance period of less than 360 days,  
38  
39 148 about 65.8 million persons were considered eligible for analysis. In addition, persons  
40  
41 149 aged younger than 30 years were excluded for data protection reasons due to the  
42  
43 150 small number of deaths among persons with diabetes in these age groups. The final  
44  
45 151 study population hence comprised a total of 47.3 million persons (Figure 1). Of these,  
46  
47 152 6.5 million persons with diabetes fulfilled the case definition for diabetes and 40.8  
48  
49 153 million persons were defined as having no diabetes. As the flow chart reveals, 0.29  
50  
51 154 million persons in the population with diabetes and 0.48 million persons in the  
52  
53 155 population without diabetes died in 2014 (Figure 1).

54 156

### 55 157 **Patient and public involvement**

56 158 No patient involved.

57  
58  
59 159

## 160 **Definition of diabetes**

161 We used the International Classification of Diseases (ICD-10) codes E10.- to E14.- to  
162 define diabetes:

- 163 • E10.- Type 1 diabetes mellitus
- 164 • E11.- Type 2 diabetes mellitus
- 165 • E12.- Malnutrition related diabetes mellitus
- 166 • E13.- Other specified diabetes mellitus, for example diabetes related to  
167 pancreatic insufficiency
- 168 • E14.- Unspecified diabetes mellitus.

169 In the outpatient setting, documentation of an additional ICD-tag “G” is required to  
170 indicate a confirmed diagnosis of diabetes. In the present analysis, this additional  
171 requirement was applied to all data originating in the outpatient setting, in order to  
172 increase the validity of the case definition for diabetes. Furthermore, an outpatient  
173 diagnosis of diabetes had to be documented in at least two quarters of the year for  
174 validation reasons. This definition is related to the m2Q criterion, which was originally  
175 used for reimbursement and is also recommended for epidemiological studies<sup>14</sup>. In  
176 the case of inpatient-documented diagnosis, one primary or secondary diagnosis of  
177 diabetes in the year 2013 was sufficient to identify a diabetes case.

178 In order to examine the impact of potential misclassification on the results, we  
179 conducted sensitivity analyses applying modified case definitions for diagnosed  
180 diabetes based on less stringent criteria: first, documentation of at least one confirmed  
181 outpatient diagnosis or one inpatient diagnosis in 2013 (“m1Q criterion”), and  
182 secondly, documentation of only one confirmed outpatient diagnosis in 2013 without  
183 any documented inpatient diagnosis.

184

## 185 **Assessment of mortality**

186 We calculated the mortality rates based on the vital status in 2014, since in the event  
187 of death no diagnoses for the year of death are available in the dataset.<sup>11</sup> The reason  
188 for this approach is that the SHI claims dataset was originally created only for  
189 morbidity-adjusted reimbursement of SHI companies and diagnoses in the year of  
190 death were not transmitted. Therefore, we used the difference of the year 2014 and  
191 the year of birth to calculate the age groups.

1  
2  
3 192 In order to examine whether assessment of vital status in the SHI claims dataset  
4  
5 193 produced plausible results, we compared the observed overall mortality rates as total  
6  
7 194 counts per 100,000 persons across age groups and stratified by sex with the  
8  
9 195 corresponding mortality rates from the official cause of death statistics in Germany for  
10  
11 196 the year 2014.<sup>15</sup> As illustrated in Figure 2 mortality rates per 100,000 persons based on  
12  
13 197 data from both sources showed high consistency in both sexes and in nearly all age  
14  
15 198 groups, with only minor deviations among middle-aged men and women 85 years of  
16  
17 199 age and older.

## 18 200 **Statistical analysis**

19  
20 201 We estimated age- and sex-specific MRRs and 95% confidence intervals using Poisson  
21  
22 202 regression. We applied the GENMOD procedure implemented in the statistical  
23  
24 203 software SAS (Version 9.4 for Windows)<sup>16</sup>. Due to the aggregated count data of our  
25  
26 204 study population, we applied a count model for MRR estimations. We preferred a  
27  
28 205 Poisson model to a log-binomial model or negative binomial model, as the Poisson  
29  
30 206 distribution provides a good approximation to the underlying binomial distribution due  
31  
32 207 to increasing sample size and better convergence properties<sup>16</sup>. One central  
33  
34 208 assumption of the model is equality of mean and variance, which is often not fulfilled  
35  
36 209 for count data. In our analyses, we had to handle a large sample size, which tends to  
37  
38 210 result in a lower variance with respect to the mean value, what is called  
39  
40 211 underdispersion and could lead to biased, smaller standard errors. Therefore, we used  
41  
42 212 the residual deviance as scale parameter.

43 213 We estimated MRRs separately for both sexes and over 5-year age groups for adults in  
44  
45 214 the age range 30 to 95 years and older. We also calculated age-adjusted MRRs  
46  
47 215 stratified by sex based on the 5-year age groups.

48 216 In order to assess the impact of modified case definitions on the study results, we  
49  
50 217 conducted two sensitivity analyses calculating the age-adjusted MRRs for men and  
51  
52 218 women as described above.

1  
2  
3 219 **Results**

4  
5 220 **Description of the study population**

6  
7 221 Compared to men, women were overrepresented in the population without diabetes,  
8  
9 222 whereas proportions of men and women were similar in the population with diabetes  
10  
11 223 (Table 1). Accordingly, the diabetes prevalence among women (12.8%) was lower than  
12  
13 224 in men (14.9%). As expected, the population with diabetes had a higher mean age  
14  
15 225 compared to the population without diabetes. On average, women were older than  
16  
17 226 men among persons with and without diabetes. In terms of absolute numbers, more  
18  
19 227 women than men died in 2014 in the population with and without diabetes. However,  
20  
21 228 age-specific and age-standardized mortality rates per 1,000 persons were consistently  
22  
23 229 higher among men than women in both populations. In both sexes, mortality rates per  
24  
25 230 1,000 persons were markedly higher among individuals with than without diabetes  
26  
27 231 (Table 1).  
28  
29  
30  
31  
32  
33  
34  
35  
36  
37  
38  
39  
40  
41  
42  
43  
44  
45  
46  
47  
48  
49  
50  
51  
52  
53  
54  
55  
56  
57  
58  
59  
60

233 **Table 1** Descriptive characteristics of the study population by diabetes status and sex  
 234 (DaTraV, age  $\geq$  30 years)

|                                                        | No diabetes |         | Diabetes |         |
|--------------------------------------------------------|-------------|---------|----------|---------|
|                                                        | Women       | Men     | Women    | Men     |
| Population size<br>in M. (2013)                        | 22,5        | 18,3    | 3,3      | 3,2     |
| Proportion (%)<br>2013                                 | 55.1        | 44.9    | 50.8     | 49.2    |
| Mean age in years 2013                                 | 55.9        | 53.6    | 71.5     | 67.9    |
| Number of deaths 2014                                  | 254,408     | 220,305 | 148,491  | 140,024 |
| Mortality rate per 1,000 persons*                      | 12.00       | 12.74   | 19.96    | 21.91   |
| Mortality rate per 1,000 persons across<br>age groups* |             |         |          |         |
| 30 to 34 years                                         | 0.30        | 0.62    | 2.03     | 4.26    |
| 35 to 39 years                                         | 0.45        | 0.87    | 1.86     | 4.38    |
| 40 to 44 years                                         | 0.77        | 1.40    | 3.75     | 5.31    |
| 45 to 49 years                                         | 1.29        | 2.34    | 4.62     | 7.64    |
| 50 to 54 years                                         | 2.23        | 4.13    | 6.95     | 10.18   |
| 55 to 59 years                                         | 3.41        | 6.73    | 9.19     | 14.55   |
| 60 to 64 years                                         | 5.21        | 10.71   | 11.18    | 19.84   |
| 65 to 69 years                                         | 7.80        | 15.44   | 15.42    | 25.84   |
| 70 to 74 years                                         | 11.63       | 22.35   | 22.56    | 38.24   |
| 75 to 79 years                                         | 19.15       | 33.64   | 35.17    | 55.34   |
| 80 to 84 years                                         | 40.02       | 62.14   | 62.97    | 89.99   |
| 85 to 89 years                                         | 83.06       | 111.42  | 113.91   | 144.18  |
| 90 to 94 years                                         | 157.24      | 191.04  | 194.06   | 229.21  |
| 95 years and older                                     | 270.33      | 303.74  | 304.13   | 336.90  |

235 \*age-standardized to the German population 2013 using all displayed age groups

236



## 237 **Main Analysis**

238 MRR estimates in association with diagnosed diabetes as obtained from Poisson  
239 regression are depicted in Figure 3. For both sexes, the age-specific MRR estimates  
240 decreased with increasing chronological age from 6.76 among women and 6.87 among  
241 men in the youngest age group to 3.12 among women and 2.46 among men aged 50-  
242 54 years to 1.13 among women and 1.11 among men aged 95 years and older. Except  
243 for persons younger than 40 years of age, MRR estimates in association with diabetes  
244 were higher among women than men. In particular, among persons 50-79 years, the  
245 MRR was between 1.26 and 1.12 significantly times higher among women than men.

246 Overall adjusted MRR estimates were comparable for women and men (1.52 vs. 1.56).  
247 Constraining our analysis to persons below 90 years of age reversed the overall age-  
248 adjusted MRRs regarding sex with still comparable estimates of 1.66 for women and  
249 1.61 for men.

## 250 **Sensitivity analyses**

251 An excess risk of death in association with diabetes among men and women was  
252 confirmed in two sensitivity analyses applying less stringent case definitions for  
253 diabetes (Table 2).

254 Compared to the main analysis, where the case definition for diabetes required  
255 documentation of a confirmed diabetes diagnosis in at least two quarters of the year  
256 2013 for outpatient data or one inpatient diagnosis of diabetes in 2013, the first case  
257 definition in Table 2 additionally includes persons with only one confirmed outpatient  
258 diagnosis of diabetes in 2013. This means that about 0.5 million persons were added to  
259 the population with diabetes and at the same time removed from the population  
260 without diabetes compared to the numbers used for the main analysis as shown in  
261 Figure 1. Results of this sensitivity analysis were similar to those of the main analysis,  
262 with only slightly lower overall MRR estimates of 1.51 among women and 1.55 among  
263 men. In contrast, markedly attenuated overall MRR estimates were obtained in the  
264 second sensitivity analysis, where the case definition for diabetes was based on the  
265 documentation of only one confirmed outpatient diagnosis. Still, the age-adjusted  
266 MRRs resulting from this case definition showed a significantly nearly 20% higher risk

of death in men and women with diagnosed diabetes compared to those without diagnosed diabetes (Table 2).

**Table 2** Sensitivity analyses applying modified diabetes case definitions: number of persons by diabetes status and age-adjusted MRRs stratified by sex (DaTraV, age  $\geq$  30 years).

|                         | Women                                 |                                | Men                                   |                                |
|-------------------------|---------------------------------------|--------------------------------|---------------------------------------|--------------------------------|
|                         | N in million (no diabetes / diabetes) | Mortality rate ratios (95% CI) | N in million (no diabetes / diabetes) | Mortality rate ratios (95% CI) |
| Sensitivity analysis 1* | 22.3 / 3.6                            | 1.51 (1.51 to 1.51)            | 18.1 / 3.4                            | 1.55 (1.55 to 1.55)            |
| Sensitivity analysis 2# | 22.3 / 0.25                           | 1.19 (1.18 to 1.20)            | 18.1 / 0.21                           | 1.20 (1.19 to 1.21)            |

\* Documentation of at least one outpatient (confirmed) or inpatient diagnosis of diabetes in 2013

# Documentation of only one outpatient (confirmed) diagnosis of diabetes in 2013. Deviations from figures in figure 1 are due to rounding.

## Discussion

### Main findings

To the best of our knowledge, we present for the first time deeply age-stratified MRR estimates in association with diagnosed diabetes among men and women 30 years of age and older in Germany based on SHI claims data covering about 90% of the population. Overall, men and women with diabetes had an about 50% higher age-adjusted risk of death compared to adults without diabetes. Across strata of increasing age, the diabetes-related MRRs considerably decreased with slightly higher estimates among women than men in the population aged 40-80 years. Results persisted in sensitivity analyses applying modified case definitions for diabetes, with the exception of markedly reduced albeit still significantly higher diabetes-related risk of death based on the least stringent case definition for diabetes requiring only one outpatient diagnosis for diabetes throughout the year 2013.

Our findings regarding age-related decreases in diabetes-related MRRs partly agree with results from two previous nationwide studies in Germany.<sup>10 17</sup> A population-based cohort study based on 12-year-mortality follow-up of adults participating in the

1  
2  
3 291 German National Health Interview and Examination Survey 1998 (GNHIES98) reported  
4  
5 292 decreasing age-specific diabetes-related MRRs in both sexes as well as overall age-  
6  
7 293 adjusted MRR estimates of similar magnitude as in the present study.<sup>17</sup> In this previous  
8  
9 294 analysis no sex differences in MRRs from all causes in association with diagnosed type  
10  
11 295 2 diabetes were observed, although significantly detection of a sex differential may  
12  
13 296 have been precluded by a limited number of deaths among adults with diabetes.  
14  
15 297 Tönnies et al. calculated type-2-diabetes-related MRR applying an illness-death model,  
16  
17 298 with estimates on diabetes prevalence and incidence derived from SHI claims data and  
18  
19 299 mortality rates of the general population from official death statistics. These authors  
20  
21 300 reported age-related decreases in MRRs, but considerably higher overall age-adjusted  
22  
23 301 MRR estimates, with higher estimates among women than men (3.0 vs. 2.3).<sup>10</sup> For  
24  
25 302 comparison with this previous study which focused on the population 65-90 years of  
26  
27 303 age in Germany we limited our analyses to the population aged 65-90 years and found  
28  
29 304 no differences in MRRs between women and men (1.47 versus 1.48. The study by  
30  
31 305 Jacobs et al.<sup>18</sup> calculated, on the basis of the DaTraV dataset as well, the excessive  
32  
33 306 deaths for women and men over 40 years of age in Germany. As no such data were  
34  
35 307 available for Germany at that time, Jacobs et al. took the mortality rates from the  
36  
37 308 Danish National Diabetes Register. The study found absolute excess deaths related to  
38  
39 309 diabetes of 81,703 for women and 92,924 for men. In contrast, using the same  
40  
41 310 methods but the estimated MRRs for Germany in our study, we found considerably  
42  
43 311 fewer absolute excess deaths of 49,136 for women and 53,872 for men.

42 Consistent with our results, nationwide studies in several other countries based on  
43  
44 313 diabetes registers or diabetes surveillance systems have reported a higher  
45  
46 314 diabetes-related risk of all-cause mortality compared to general population or  
47  
48 315 population- based controls but differ in magnitude.<sup>4-6 8 19</sup>

49  
50 316 The Swedish national diabetes register and the Australian diabetes surveillance  
51  
52 317 showed that the excess risk of death in association with diagnosed type 2 diabetes  
53  
54 318 declined with increasing chronological age.<sup>6 8</sup> Although the present study could not  
55  
56 319 differentiate by type of diabetes, these results are in line with our findings, since type 2  
57  
58 320 diabetes accounts for the vast majority of diabetes cases among older adults. The age-  
59  
60 321 related decline in diabetes-related excess risk of all-cause mortality might be due to

1  
2  
3 322 the different onsets of diabetes on the life span and the associated disease durations.  
4  
5 323 It may reflect increases in competing risk of death in older age groups as well as  
6  
7 324 survival disadvantage in association with increased diabetes duration. In addition, the  
8  
9 325 number of severe comorbidities in people with and without diabetes converges with  
10  
11 326 increasing age.

12  
13 327 With regard to sex differences in diabetes-related relative risk or excess risk of all-  
14  
15 328 cause mortality, previous studies from other countries showed conflicting findings.<sup>4 5 8</sup>  
16  
17 329 Our age-specific estimates of diabetes-related MRRs showed higher risk estimates  
18  
19 330 among women than among men for persons aged 50-79. This higher risk among  
20  
21 331 women declined with increasing age and diminished in the oldest age groups. This  
22  
23 332 consistent pattern is comparable to a study from Australia for 2004-2010 which  
24  
25 333 showed higher standardized mortality ratios (SMRs) in women than in men especially  
26  
27 334 for persons aged 50-79 years and very similar SMRs for women and men aged 80 years  
28  
29 335 or older (1.03 and 0.98).<sup>8</sup> A recently conducted systematic review and meta-analysis  
30  
31 336 including 49 studies with 86 prospective cohorts showed a combined MRR of 1.93 for  
32  
33 337 women and 1.74 for men with a pooled women-to-men RRR of 1.13.<sup>7</sup> However  
34  
35 338 estimates across studies ranged from 1.24 to 3.67 in women and from 1.32 to 3.13 in  
36  
37 339 men, pooled women-to-men RRR varied from 0.64 to 1.74.<sup>7</sup> Overall, differences in  
38  
39 340 study results regarding a sex differential in excess risk of diabetes-related all-cause  
40  
41 341 mortality might, at least in part, be explained by differences in the age range,  
42  
43 342 underestimation of older people, time of follow-up and applied methods for risk  
44  
45 343 estimation.

46  
47 344 Prospective population-based studies are needed to obtain a deeper insight into the  
48  
49 345 role of sex difference in diabetes-related mortality risks by taking relevant risk factors  
50  
51 346 such as lifestyle behavior, adherence to prescribed therapy and co-morbidities into  
52  
53 347 account.

### 54 348 **Practical implications**

55 349 Our findings confirm that diagnosed diabetes in Germany is still associated with a  
56  
57 350 significantly elevated, several times higher risk of death among men and women, in  
58  
59 351 particular in younger and middle age. This emphasizes the need for effective primary  
60  
352 and secondary prevention. Further improvements in the early detection of diabetes,

1  
2  
3 353 particularly in younger ages, alongside with evidence-based treatments, could  
4  
5 354 contribute to a reduction in excess mortality.  
6  
7 355 Our results open the perspective to close an important gap in diabetes surveillance in  
8  
9 356 Germany, as the SHI claims dataset appears to be suitable for close monitoring of  
10  
11 357 diabetes-related excess risk of death, which is a key indicator in the national diabetes  
12  
13 358 surveillance system. In addition, the dataset will permit calculation of closely related  
14  
15 359 indicators, including the absolute number of deaths in association with diabetes, and  
16  
17 360 composite indicators of disease burden, including healthy life years and the number of  
18  
19 361 years lost in association with diabetes.<sup>20</sup> Thus, including SHI claims data dataset will  
20  
21 362 harness the potential for improved health information systems as a basis for the  
22  
23 363 surveillance of diabetes and other noncommunicable diseases (NCD).

### 24 364 **Strengths and limitations**

25 365 The main strength of our analysis is the completeness of the dataset, since about 90%  
26  
27 366 of the German population is covered by SHI. Mortality rates derived from the SHI  
28  
29 367 claims dataset showed good agreement with data from official death statistics, which  
30  
31 368 underlines the potential for generalization of our results. Our findings from sensitivity  
32  
33 369 analyses support the validity of the data. We consistently showed an excess risk of all-  
34  
35 370 cause mortality in association with diagnosed diabetes based on varying case  
36  
37 371 definitions for diabetes.

38 372 Taken together, our results demonstrate that the DaTraV dataset could essentially  
39  
40 373 contribute to close current gaps in diabetes surveillance with an overall good  
41  
42 374 documentation quality of diabetes and the advantage to consider inpatient as well as  
43  
44 375 outpatient data for case definition.

45 376 A great disadvantage of routine datasets based solely on documented diagnoses is that  
46  
47 377 no information about undiagnosed morbidity can be drawn. National surveys with an  
48  
49 378 additional HbA1c measurement in blood samples of participants show a relevant  
50  
51 379 proportion of undiagnosed diabetes. Although this proportion has decreased over  
52  
53 380 time, it is still relatively high<sup>21</sup> and at the same time is related to a slightly higher  
54  
55 381 excess mortality than diagnosed diabetes.<sup>17 22</sup> For this reason the current routine data  
56  
57 382 analysis is likely to underestimate the excess mortality in diabetes. In general, another  
58  
59  
60

1  
2  
3 383 limitation of routine data is that this data cannot identify the ethnicity of individuals.  
4  
5 384 An ethnic risk profile is being discussed for diabetes in particular.<sup>23</sup>  
6  
7 385 There are a number of limitations which arise from the specific construction of the  
8  
9 386 DaTraV dataset, which originally served economic but not research purposes. We had  
10  
11 387 to determine cases of diabetes in the data in 2013 only, in order to identify persons  
12  
13 388 who died in 2014 among persons with and without diabetes. This implies that those  
14  
15 389 who died with newly documented diabetes in 2014 are not detectable in the data as  
16  
17 390 diabetes cases and hence will be counted as persons without diabetes. We cannot  
18  
19 391 exclude that this also contributed to an underestimation of diabetes-related excess  
20  
21 392 mortality. Since diabetes is a chronic disease, and long-term complications account for  
22  
23 393 the majority of diabetes-related deaths, we assume that this had only little impact on  
24  
25 394 our results. The planned revision of the Data Transparency Regulations in Germany  
26  
27 395 could help to overcome current shortcomings.  
28  
29 396 Furthermore, the currently missing stratification of the dataset according to  
30  
31 397 geographic region and social status or social deprivation should be possible in the  
32  
33 398 future, hence we will be able to analyze and compare mortality trends within Germany  
34  
35 399 as well as at a national level with other countries.  
36  
37 400  
38  
39 401 The present study included adults 30 years of age and older, and type 2 diabetes is  
40  
41 402 likely to account for most cases of documented diabetes. Nevertheless, it will be  
42  
43 403 important to overcome current limitations to differentiate between major types of  
44  
45 404 diabetes in claims data. The main problem is the frequent coding of an unspecific  
46  
47 405 diabetes (ICD-10: E14.-) or even diagnoses that are mutually exclusive (E10.- and E11.-)  
48  
49 406 in the data.<sup>24</sup> A recent analysis of the here used dataset has demonstrated that  
50  
51 407 including information on medication may improve assignment of unspecific diabetes  
52  
53 408 codes to type 2 diabetes.<sup>25</sup> Among children and adolescents type 1 diabetes is the  
54  
55 409 predominant type of diabetes. As insulin treatment is required here, documented  
56  
57 410 insulin use is an essential part of the case definition for type 1 diabetes, and also helps  
58  
59 411 to clarify diabetes definition.<sup>26</sup>  
60

## 412 **Conclusions**

413 Diabetes-related risk of death is a key indicator for monitoring diabetes epidemiology  
414 and quality of diabetes care. Establishing sustainable time trends for this indicator as  
415 part of the national diabetes surveillance system in Germany is of great need, but was  
416 so far precluded by the lack of a valid and timely accessible dataset. Results of the  
417 present study demonstrate that analysis of SHI claims data may provide a solution in  
418 closing this information gap. Further research is needed to analyze and to improve the  
419 quality of the data, in particular with regard to case definitions. In this case, the SHI  
420 claims data could also serve to calculate and monitor the absolute number of diabetes-  
421 related deaths as well as composite indicators of disease burden, such as diabetes-  
422 related healthy life years and years of life lost. Stratification of SHI claims data  
423 according to geographic region and social status or social deprivation will be possible  
424 in the future, hence we will be able to analyze and compare diabetes-related mortality  
425 trends within Germany but also with international developments.<sup>3</sup> This will strengthen  
426 surveillance activities for the prevention and control of diabetes and other major NCD  
427 at a national level and also enhance international collaboration in diabetes and NCD  
428 surveillance and burden of disease estimates.



430 **Footnotes**

431

432 **Contributors:** CS, JB and CH designed the study. CS, LR and JB performed the analysis. CS, CSN  
433 and JB wrote the initial version of the manuscript. LR, RP and TZ revised the manuscript. All  
434 authors read and approved the final manuscript. All authors had full access to all of the data  
435 (including statistical reports and tables) in the study and can take responsibility for the  
436 integrity of the data and the accuracy of the data analysis. CS is the lead author and guarantor.

437

438 **Transparency declaration:** The lead author affirms that this manuscript is an honest, accurate,  
439 and transparent account of the study being reported; that no important aspects of the study  
440 have been omitted; and that any discrepancies from the study as planned (and, if relevant,  
441 registered) have been explained.

442

443 **Funding:** The project to establish national diabetes surveillance at the Robert Koch Institute is  
444 funded by the German Federal Ministry of Health (funding code: GE 2015 03 23). The project  
445 to promote and further develop the use of external sources of data to secure (establish and  
446 expand) national level diabetes surveillance is funded by the Federal Ministry of Health  
447 (funding code: GE 2019 03 05).

448

449 **Competing interests:** All authors have completed the Unified Competing Interest form at  
450 [www.icmje.org/coi\\_disclosure.pdf](http://www.icmje.org/coi_disclosure.pdf) (available on request from the corresponding author) and  
451 declare: no support from any organisation for the submitted work, no financial relationships  
452 with any organisations that might have an interest in the submitted work in the previous three  
453 years no other relationships or activities that could appear to have influenced the submitted  
454 work.

455 **Ethics approval:** This study was not approved by a research ethics committee, because our  
456 study did not meet the criteria for human subjects research.

457 **Data sharing:** The SQL code for requesting aggregated data and statistical codes available from  
458 the corresponding author at [schmidtchri@rki.de](mailto:schmidtchri@rki.de).



1  
2  
3 460 **Figure 1** Flow chart of selection of study population with excluding criteria and sample  
4 461 sizes.

5  
6 462

7 463 **Figure 2** Age-specific mortality rates per 100,000 persons stratified by sex for the year  
8 464 2014 as obtained from official cause of death statistics (Destatis) and claims data  
9 465 (Datrav). The blue line indicates results from official statistics; the green line indicates  
10 466 results from the DaTraV dataset.

11  
12  
13 467

14  
15 468 **Figure 3** MRRs for persons with diabetes compared to persons without diabetes by sex  
16 469 and age groups. Overall estimates are adjusted using all displayed age groups.

17  
18  
19  
20  
21  
22  
23  
24  
25  
26  
27  
28  
29  
30  
31  
32  
33  
34  
35  
36  
37  
38  
39  
40  
41  
42  
43  
44  
45  
46  
47  
48  
49  
50  
51  
52  
53  
54  
55  
56  
57  
58  
59  
60

For peer review only

471 **References**

- 472 1. NCD Risk Factor Collaboration (NCD-RisC). Worldwide trends in diabetes since 1980: a  
473 pooled analysis of 751 population-based studies with 4.4 million participants. *Lancet*  
474 (*London, England*) 2016;387(10027):1513-30. doi: 10.1016/s0140-6736(16)00618-8  
475 [published Online First: 2016/04/12]
- 476 2. Williams J, Loeffler M, Metrics ftfH, et al. Global Trends in Type 2 Diabetes, 2007-2017.  
477 *JAMA* 2019;322(16):1542-42. doi: 10.1001/jama.2019.16074
- 478 3. Harding JL, Pavkov ME, Magliano DJ, et al. Global trends in diabetes complications: a review  
479 of current evidence. *Diabetologia* 2019;62(1):3-16. doi: 10.1007/s00125-018-4711-2
- 480 4. Green A, Sortsø C, Jensen PB, et al. Incidence, morbidity, mortality, and prevalence of  
481 diabetes in Denmark, 2000-2011: results from the Diabetes Impact Study 2013. *Clin*  
482 *Epidemiol* 2015;7:421-30. doi: 10.2147/CLEP.S88577
- 483 5. Read SH, Kerssens JJ, McAllister DA, et al. Trends in type 2 diabetes incidence and mortality  
484 in Scotland between 2004 and 2013. *Diabetologia* 2016;59(10):2106-13. doi:  
485 10.1007/s00125-016-4054-9 [published Online First: 2016/07/29]
- 486 6. Tancredi M, Rosengren A, Svensson AM, et al. Excess Mortality among Persons with Type 2  
487 Diabetes. *The New England journal of medicine* 2015;373(18):1720-32. doi:  
488 10.1056/NEJMoa1504347 [published Online First: 2015/10/29]
- 489 7. Wang Y, O'Neil A, Jiao Y, et al. Sex differences in the association between diabetes and risk  
490 of cardiovascular disease, cancer, and all-cause and cause-specific mortality: a  
491 systematic review and meta-analysis of 5,162,654 participants. *BMC Medicine*  
492 2019;17(1):136. doi: 10.1186/s12916-019-1355-0
- 493 8. Harding JL, Shaw JE, Peeters A, et al. Mortality Trends Among People With Type 1 and Type  
494 2 Diabetes in Australia: 1997–2010. *Diabetes care* 2014;DC\_140096. doi:  
495 10.2337/dc14-0096
- 496 9. Heidemann C, Scheidt-Nave C. Prevalence, incidence and mortality of diabetes mellitus in  
497 adults in Germany – A review in the framework of the Diabetes Surveillanc: Robert  
498 Koch-Institut, Epidemiologie und Gesundheitsberichterstattung, 2017.
- 499 10. Tönnies T, Hoyer A, Brinks R. Excess mortality for people diagnosed with type 2 diabetes in  
500 2012 – Estimates based on claims data from 70 million Germans. *Nutrition,*  
501 *Metabolism and Cardiovascular Diseases* 2018;28(9):887-91. doi:  
502 <https://doi.org/10.1016/j.numecd.2018.05.008>
- 503 11. German Institute of Medical Documentation and Information (DIMDI). Health Care Data.  
504 <https://www.dimdi.de/dynamic/en/further-services/health-care-data/>.
- 505 12. Busse R, Blümel M, Knieps F, et al. Statutory health insurance in Germany: a health system  
506 shaped by 135 years of solidarity, self-governance, and competition. *The Lancet*  
507 2017;390(10097):882-97. doi: 10.1016/S0140-6736(17)31280-1
- 508 13. Schmidt C, Heidemann C, Rommel A, et al. Secondary data in diabetes surveillance – co-  
509 operation projects and definition of references on the documented prevalence of  
510 diabetes. *Journal of Health Monitoring* 2019;4(2):50--63. doi:  
511 <http://dx.doi.org/10.25646/5988>
- 512 14. Schubert I, Ihle P, Koster I. [Internal confirmation of diagnoses in routine statutory health  
513 insurance data: concept with examples and case definitions]. *Gesundheitswesen*  
514 (*Bundesverband der Ärzte des Öffentlichen Gesundheitsdienstes (Germany)*)  
515 2010;72(6):316-22. doi: 10.1055/s-0030-1249688 [published Online First: 2010/05/19]
- 516 15. Statistisches Bundesamt. Fachserie 12 Reihe 4. Gesundheit. Todesursachen in Deutschland  
517 2014. [https://www.destatis.de/GPStatistik/receive/DEHeft\\_heft\\_00035170](https://www.destatis.de/GPStatistik/receive/DEHeft_heft_00035170). In  
518 German.
- 519 16. Fang J. Using SAS® Procedures FREQ, GENMOD, LOGISTIC, and PHREG to Estimate Adjusted  
520 Relative Risks – A Case Study. SAS Global Forum, 2011.

- 1  
2  
3 521 17. Röckl S, Brinks R, Baumert J, et al. All-cause mortality in adults with and without type 2  
4 522 diabetes: findings from the national health monitoring in Germany. *BMJ open diabetes*  
5 523 *research & care* 2017;5(1):e000451-e51. doi: 10.1136/bmjdr-2017-000451  
6 524 18. Jacobs E, Hoyer A, Brinks R, et al. Burden of Mortality Attributable to Diagnosed Diabetes:  
7 525 A Nationwide Analysis Based on Claims Data From 65 Million People in Germany.  
8 526 *Diabetes care* 2017;40(12):1703-09. doi: 10.2337/dc17-0954 [published Online First:  
9 527 2017/10/11]  
10 528 19. Gregg EW, Cheng YJ, Srinivasan M, et al. Trends in cause-specific mortality among adults  
11 529 with and without diagnosed diabetes in the USA: an epidemiological analysis of linked  
12 530 national survey and vital statistics data. *The Lancet* 2018;391(10138):2430-40. doi:  
13 531 10.1016/S0140-6736(18)30314-3  
14 532 20. Baumert J, von der Lippe E, Paprott R, et al. Life expectancy and healthy life years  
15 533 associated with diabetes in Germany. *European Journal of Public Health*  
16 534 2020;30(Supplement\_5) doi: 10.1093/eurpub/ckaa165.814  
17 535 21. Heidemann C, Du Y, Paprott R, et al. Temporal changes in the prevalence of diagnosed  
18 536 diabetes, undiagnosed diabetes and prediabetes: findings from the German Health  
19 537 Interview and Examination Surveys in 1997-1999 and 2008-2011. *Diabetic medicine : a*  
20 538 *journal of the British Diabetic Association* 2016;33(10):1406-14. doi:  
21 539 10.1111/dme.13008 [published Online First: 2015/10/27]  
22 540 22. Paprott R, Schaffrath Rosario A, Busch MA, et al. Association Between Hemoglobin A1c and  
23 541 All-Cause Mortality: Results of the Mortality Follow-up of the German National Health  
24 542 Interview and Examination Survey 1998. *Diabetes care* 2015;38(2):249-56. doi:  
25 543 10.2337/dc14-1787  
26 544 23. Xu G, Liu B, Sun Y, et al. Prevalence of diagnosed type 1 and type 2 diabetes among US  
27 545 adults in 2016 and 2017: population based study. *BMJ* 2018;362:k1497. doi:  
28 546 10.1136/bmj.k1497  
29 547 24. Tamayo T, Brinks R, Hoyer A, et al. The Prevalence and Incidence of Diabetes in Germany.  
30 548 *Dtsch Arztebl Int* 2016;113(11):177-82. doi: 10.3238/arztebl.2016.0177 [published  
31 549 Online First: 2016/04/28]  
32 550 25. Thoren Ct, Schwalm A, Mostardt S, et al. Can Routine Data be used to Determine the  
33 551 Target Population of Patients with Type 2 Diabetes in Early Benefit Assessments in  
34 552 Germany? *Gesundheitswesen (Bundesverband der Ärzte des Öffentlichen*  
35 553 *Gesundheitsdienstes (Germany))* (EFirst) doi: 10.1055/a-0948-5301 [published Online  
36 554 First: 26.08.2019]  
37 555 26. Bohn B, Schwandt A, Ihle P, et al. Hospital admission in children and adolescents with or  
38 556 without type 1 diabetes from Germany: An analysis of statutory health insurance data  
39 557 on 12 million subjects. *Pediatric diabetes* 2018;19(4):721-26. doi: 10.1111/pedi.12621  
40 558 [published Online First: 2017/12/12]  
41  
42  
43  
44  
45  
46  
47  
48  
49  
50  
51  
52  
53  
54  
55  
56  
57  
58  
59  
60

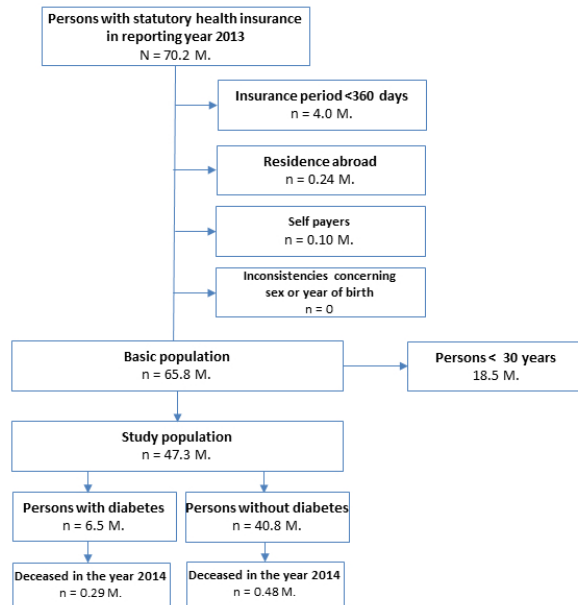

Figure 1 Flow chart of selection of study population with excluding criteria and sample sizes.

Figure 1 Flow chart of selection of study population with excluding criteria and sample sizes

254x190mm (96 x 96 DPI)

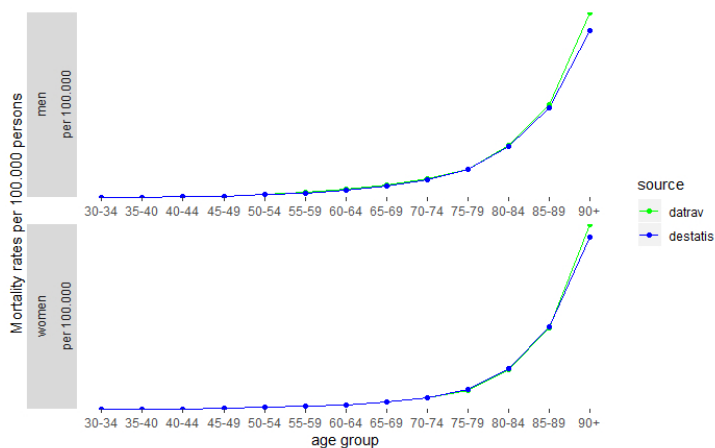

Figure 2 Age-specific mortality rates per 100,000 persons stratified by sex for the year 2014 as obtained from official cause of death statistics (Destatis) and claims data (Datrav). The blue line indicates results from official statistics; the green line indicates results from the DaTraV dataset.

Figure 2 Age-specific mortality rates per 100,000 persons stratified by sex for the year 2014 as obtained from official cause of death statistics (Destatis) and claims data (Datrav). The blue line indicates results from official statistics; the green line indicates results from the DaTraV dataset.

254x190mm (96 x 96 DPI)

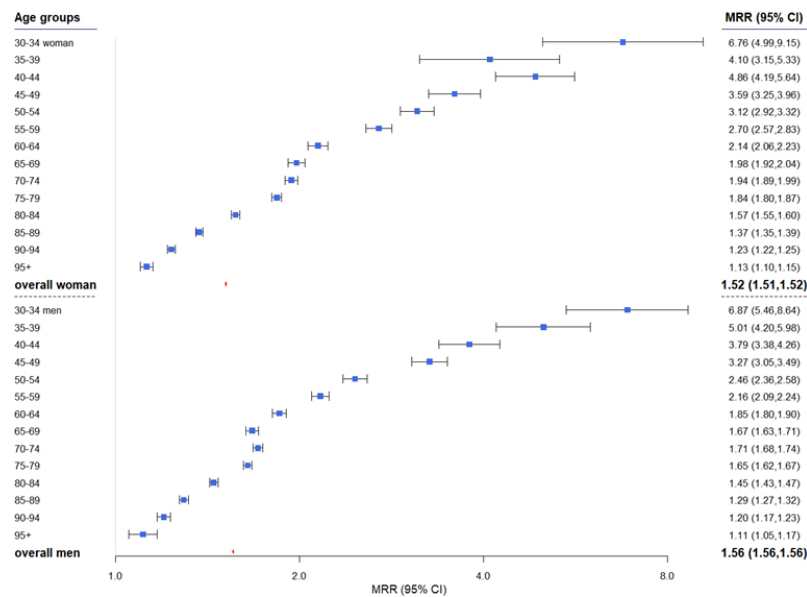

**Figure 3** MRRs for persons with diabetes compared to persons without diabetes by sex and age groups. Overall estimates are adjusted using all displayed age groups.

Figure 3 MRRs for persons with diabetes compared to persons without diabetes by sex and age groups. Overall estimates are adjusted using all displayed age groups.

254x190mm (96 x 96 DPI)

STROBE Statement—Checklist of items that should be included in reports of *cohort studies*

|                              | Item No | Recommendation                                                                                                                                                                                    | Page No |
|------------------------------|---------|---------------------------------------------------------------------------------------------------------------------------------------------------------------------------------------------------|---------|
| <b>Title and abstract</b>    | 1       | (a) Indicate the study's design with a commonly used term in the title or the abstract                                                                                                            | 2       |
|                              |         | (b) Provide in the abstract an informative and balanced summary of what was done and what was found                                                                                               | 2       |
| <b>Introduction</b>          |         |                                                                                                                                                                                                   |         |
| Background/rationale         | 2       | Explain the scientific background and rationale for the investigation being reported                                                                                                              | 4,5     |
| Objectives                   | 3       | State specific objectives, including any prespecified hypotheses                                                                                                                                  | 5       |
| <b>Methods</b>               |         |                                                                                                                                                                                                   |         |
| Study design                 | 4       | Present key elements of study design early in the paper                                                                                                                                           | 2,5-6   |
| Setting                      | 5       | Describe the setting, locations, and relevant dates, including periods of recruitment, exposure, follow-up, and data collection                                                                   | 2,5-6   |
| Participants                 | 6       | (a) Give the eligibility criteria, and the sources and methods of selection of participants. Describe methods of follow-up                                                                        | 6, 7    |
|                              |         | (b) For matched studies, give matching criteria and number of exposed and unexposed                                                                                                               | NA      |
| Variables                    | 7       | Clearly define all outcomes, exposures, predictors, potential confounders, and effect modifiers. Give diagnostic criteria, if applicable                                                          | 6,7     |
| Data sources/<br>measurement | 8*      | For each variable of interest, give sources of data and details of methods of assessment (measurement). Describe comparability of assessment methods if there is more than one group              | 5,6     |
| Bias                         | 9       | Describe any efforts to address potential sources of bias                                                                                                                                         | 8       |
| Study size                   | 10      | Explain how the study size was arrived at                                                                                                                                                         | 6       |
| Quantitative variables       | 11      | Explain how quantitative variables were handled in the analyses. If applicable, describe which groupings were chosen and why                                                                      | 8       |
| Statistical methods          | 12      | (a) Describe all statistical methods, including those used to control for confounding                                                                                                             | 8       |
|                              |         | (b) Describe any methods used to examine subgroups and interactions                                                                                                                               | 8       |
|                              |         | (c) Explain how missing data were addressed                                                                                                                                                       | NA      |
|                              |         | (d) If applicable, explain how loss to follow-up was addressed                                                                                                                                    | NA      |
|                              |         | (e) Describe any sensitivity analyses                                                                                                                                                             | 8,11    |
| <b>Results</b>               |         |                                                                                                                                                                                                   |         |
| Participants                 | 13*     | (a) Report numbers of individuals at each stage of study—eg numbers potentially eligible, examined for eligibility, confirmed eligible, included in the study, completing follow-up, and analysed | 6       |
|                              |         | (b) Give reasons for non-participation at each stage                                                                                                                                              | NA      |
|                              |         | (c) Consider use of a flow diagram                                                                                                                                                                | 6       |
| Descriptive data             | 14*     | (a) Give characteristics of study participants (eg demographic, clinical, social) and information on exposures and potential confounders                                                          | 8-10    |
|                              |         | (b) Indicate number of participants with missing data for each variable of interest                                                                                                               | NA      |
|                              |         | (c) Summarise follow-up time (eg, average and total amount)                                                                                                                                       | NA      |
| Outcome data                 | 15*     | Report numbers of outcome events or summary measures over time                                                                                                                                    | 10      |

|    |                          |    |                                                                                                                                                                                                              |       |
|----|--------------------------|----|--------------------------------------------------------------------------------------------------------------------------------------------------------------------------------------------------------------|-------|
| 1  | Main results             | 16 | (a) Give unadjusted estimates and, if applicable, confounder-adjusted estimates and their precision (eg, 95% confidence interval). Make clear which confounders were adjusted for and why they were included | 10,11 |
| 2  |                          |    | (b) Report category boundaries when continuous variables were categorized                                                                                                                                    | NA    |
| 3  |                          |    | (c) If relevant, consider translating estimates of relative risk into absolute risk for a meaningful time period                                                                                             | NA    |
| 4  |                          |    |                                                                                                                                                                                                              |       |
| 5  |                          |    |                                                                                                                                                                                                              |       |
| 6  |                          |    |                                                                                                                                                                                                              |       |
| 7  |                          |    |                                                                                                                                                                                                              |       |
| 8  |                          |    |                                                                                                                                                                                                              |       |
| 9  | Other analyses           | 17 | Report other analyses done—eg analyses of subgroups and interactions, and sensitivity analyses                                                                                                               | 11,12 |
| 10 |                          |    |                                                                                                                                                                                                              |       |
| 11 | <b>Discussion</b>        |    |                                                                                                                                                                                                              |       |
| 12 |                          |    |                                                                                                                                                                                                              |       |
| 13 | Key results              | 18 | Summarise key results with reference to study objectives                                                                                                                                                     | 12-14 |
| 14 |                          |    |                                                                                                                                                                                                              |       |
| 15 | Limitations              | 19 | Discuss limitations of the study, taking into account sources of potential bias or imprecision. Discuss both direction and magnitude of any potential bias                                                   | 15,16 |
| 16 |                          |    |                                                                                                                                                                                                              |       |
| 17 | Interpretation           | 20 | Give a cautious overall interpretation of results considering objectives, limitations, multiplicity of analyses, results from similar studies, and other relevant evidence                                   | 12-14 |
| 18 |                          |    |                                                                                                                                                                                                              |       |
| 19 |                          |    |                                                                                                                                                                                                              |       |
| 20 | Generalisability         | 21 | Discuss the generalisability (external validity) of the study results                                                                                                                                        | 15,16 |
| 21 |                          |    |                                                                                                                                                                                                              |       |
| 22 | <b>Other information</b> |    |                                                                                                                                                                                                              |       |
| 23 | Funding                  | 22 | Give the source of funding and the role of the funders for the present study and, if applicable, for the original study on which the present article is based                                                | 18    |
| 24 |                          |    |                                                                                                                                                                                                              |       |
| 25 |                          |    |                                                                                                                                                                                                              |       |

\*Give information separately for exposed and unexposed groups.

**Note:** An Explanation and Elaboration article discusses each checklist item and gives methodological background and published examples of transparent reporting. The STROBE checklist is best used in conjunction with this article (freely available on the Web sites of PLoS Medicine at <http://www.plosmedicine.org/>, Annals of Internal Medicine at <http://www.annals.org/>, and Epidemiology at <http://www.epidem.com/>). Information on the STROBE Initiative is available at <http://www.strobe-statement.org>.
